# Supplementary material
Source: PubMed Central journal article supplement (PMC5293026)
Supplement: pnas.1619726114.sapp.pdf [file pnas.1619726114.sapp.pdf]

## **Supporting Information**

### **Materials and Methods**

**Antibodies.** The rabbit anti-BAF180 polyclonal antibody raised against BAF180 residues 736-1475 was a gift from Ramon Parsons (31). A rat monoclonal antibody was created by the Dana-Farber Cancer Institute Antibody Core Facility after immunizing rats with a GST-BAF180 (1190-1430) fusion protein. Mouse anti-BRG1 antibody (sc-17796), goat anti-BAF155 (sc-9746), mouse anti-BAF200 (ARID2, sc-166117), mouse anti-BAF250a (sc-32761) and mouse anti-BAP1 (sc-28383) were purchased from Santa Cruz Biotechnology. Mouse anti-Vinculin monoclonal antibody (V9131) was from Sigma Aldrich. Mouse anti-BAF47 antibody (#612110) was from BD Biosciences. Rabbit anti-BRM antibody (#6889), mouse monoclonal anti-HA antibody (6E2) (HRP conjugate) and rabbit monoclonal anti-SETD2 antibody (#23486) were from Cell Signaling Technology.

**Cell Culture.** The sources of the cell lines used in this study and the media used to maintain them were described by us previously (26, 32). A704 was maintained in Eagle's Minimum Essential Medium (EMEM) supplemented with 2mM Glutamine, 1% Non Essential Amino Acids (NEAA), 1mM Sodium Pyruvate and 15% FBS.

**Plasmids.** pBabe-BAF180, which contains a wild-type BAF180, was from Dr. Ramon Parsons (31). The mutant BAF180Q1298\* cDNA was generated by overlapping PCR using pBabe-BAF180 as the template. The BAF180 wild-type, Q1298\*,  $\Delta$ 2BD and  $\Delta$ 6BD cDNAs were PCR amplified with primers that introduced a 5' AgeI site and a 3' ClaI site, digested with these two enzymes, and subcloned into pTRIPz-neo vector that was modified to

contain AgeI and ClaI multiple cloning sites (a gift of Dr. Gang Lu) (the PCR primers were listed in Supplemental Table 3). A BRG1 cDNA with sgRNA-resistant synonymous mutations was generated by overlapping PCR using pBABE-BRG1 (a gift from Robert Kingston, Addgene plasmid # 1959) as a template and cloned into pDONR223. The cDNA was then shuttled into pLL3.7EF1a-PGK-Hygro-DEST using a Gateway Cloning Kit (#11791100, Invitrogen). All of the cDNAs described above were authenticated by DNA sequencing.

**Generation of Lentiviruses:** Lentiviruses were made using 293FT cells according to Broad Institute TRC protocol (<http://portals.broadinstitute.org/gpp/public/resources/protocols>). In brief, 293FT cells were maintained in DMEM supplemented with 10% FBS, 0.1 mM MEM non-essential amino acids, 6 mM L-glutamine, and 1 mM sodium pyruvate without any antibiotics. On day 0,  $5 \times 10^5$  cells in 2 ml of media per well were plated into 6-well plates. The next day the media was changed to fresh media and the cells were transfected with 0.5  $\mu$ g of pspAX2, 0.05  $\mu$ g of pMD2.G and 0.5  $\mu$ g per well using Lipofectamine 2000 (Invitrogen) according to manufacturer's protocol. On day 2, the media was replaced with fresh media supplemented with 30% FBS. On day 3, the supernatants were collected and filtered through 0.45  $\mu$ m filter membrane.

**Preparation of Nuclear Extracts.** Cells at 80% confluence were collected with a cell scraper and washed twice with ice cold PBS. After centrifugation at 1,000g for 3 min at 4 °C the cell pellets were resuspended in 5 pellet volumes of hypotonic buffer (10 mM HEPES, pH 7.5, 1.5 mM MgCl<sub>2</sub>, 10 mM KCl, 1 mM EDTA, 1 mM EGTA, and 1 mM DTT) containing

protease inhibitors (#11697498001, Roche) for 30 min and then disrupted by passing through a 22G needle 10 times. The suspensions were then centrifuged at 1,000g for 10 min at 4 °C. The pellets were resuspended in 2.5 pellet volumes of the same hypotonic buffer. 5M NaCl was added to a final concentration of 420 mM and then the suspensions were slowly rotated for 30 min at 4 °C. The lysates were then centrifuged at 100,000g for 1 hr at 4°C and the supernatants were collected.

**BAF180 Mutation Identification.** Total RNA was extracted using Trizol reagent (Invitrogen). cDNAs were synthesized using AffinityScript QPCR cDNA Synthesis Kit (#600559, Agilent Technologies). Overlapping BAF180 cDNA fragments were PCR amplified using a high fidelity thermostable DNA polymerase (One Taq; New England Biolabs) and sequenced using the Sanger method. See Supplemental Table 4 for primers.

**BAF180 Homologous Recombination.** The BAF180 homologous recombination template that introduced the N-terminal FLAG-HA epitope was created using Gibson assembly (Supplemental Figure 14). In brief, the CMV-TK-pA cassette (containing the negative selection marker) present in pAL119-TK (a gift from Dr. Maria Castro; Addgene plasmid # 21911) was recovered by PCR. The BAF180 exon containing the start ATG and surrounding intronic sequences were PCR amplified using genomic DNA extracted from 786-O using a 5' primer that introduced an N-terminal FLAG-HA tag. A cassette containing the positive selection marker in the reverse strand (PGK-puro-2A-EGFP-pA) was made by overlapping PCR. In one reaction the PGK-puro fragment in pLenti X1 Puro DEST (694-6)(a gift from Eric Campeau; Addgene plasmid # 17297) was PCR amplified with a 5' primer that introduced a loxP site at the 5' end. In the other reaction the 2A-EGFP-pA fragment in

pSpCas9(BB)-2A-GFP (PX458; Addgene plasmid #48138) was amplified with a 3' primer that introduced a loxP site at the 3' end. Aliquots of these two PCR reactions were then mixed and reamplified with the outer primers. The cassettes were then assembled into a modified AAV vector (based on pAAV-MCS Promoterless Expression Vector from Cell Biolabs Inc, VPK-411) restricted with ClaI and XhoI. The U6 promoter and the sgRNA cloning site from Lenti-CRISPRv2.0 (Addgene) was recovered PCR and subcloned into pAAV-MCS into which was inserted a duplex oligonucleotide encoding a sgBAF180 (TTCTTCTCTTGGAACCCA). AAV viruses were generated according to a manufacturers protocol (Cell Biolabs Inc). 786-O cells were coinfectd with these two AAV virus expressing either repair template or sgBAF180, and an adenovirus expressing Cas9 (1900, Vector Biolabs). Three days after infection puromycin was added. After an additional three days the surviving cells were subcloned into 96-well plates and cultured in the presence of ganciclovir (negative selection) and puromycin (positive selection) for two more weeks. The green clones (EGFP expressing) were expanded and tested for the presence of FLAG-HA tagged BAF180 by immunoblot analysis.

**BAF180 Tandem Immunoprecipitation.** For each experimental condition the cells from twenty 15 cm plates of confluent cells were pelleted and resuspended in 2.5 pellet volumes of FLAG lysis buffer (50 mM Tris, pH 8.0, 137 mM NaCl, 1 mM EDTA, 1% Triton X100, 10% glycerol, and 10 mM NaF). The final NaCl concentration was adjusted to 420 mM by adding 0.15 volumes of 5 M NaCl. The resuspended samples were gently rotated end over end for 30 mins at 4 °C, after which 3 volumes of FLAG lysis buffer was added to each sample. The lysates were ultracentrifuged at 100,000g for 1 hr at 4 °C. The supernatants were collected

and their protein concentrations, measured using the Bradford Assay, were adjusted to 1 mg/ml by adding FLAG lysis buffer. 500 µl of Anti-FLAG M2 agarose (M8823, Sigma Aldrich), prewashed with FLAG lysis buffer, was added to the supernatants in 50 ml falcon tubes and incubated for 2 hrs at 4 °C. The agarose was washed 5 times with FLAG-lysis buffer and then eluted by incubating in 1.5 ml of FLAG Lysis buffer containing 0.2 mg/ml 3XFLAG peptide with rotation overnight at 4 °C. The supernatant containing the eluted proteins was then mixed with 30 µl pre-washed anti-HA agarose (SC-7392AC, Santa Cruz Biotechnology) for 4 hrs at 4 °C. The anti-HA agarose was then washed 5 times with FLAG-lysis buffer and then eluted by incubating in 60 µl of FLAG lysis buffer containing 0.2 mg/ml HA peptide (I2149, Sigma Aldrich) with rotation for 4 hrs at 4 °C. The eluted samples were either resolved by SDS-PAGE and silver stained or precipitated with trichloroacetic acid (TCA) and subjected to mass spectrometry analysis.

**Glycerol Gradient Centrifugation.** Nuclear extracts were prepared as described above (hereby referred to as S100). Glycerol gradient solutions were made in hypotonic lysis buffer adjusted to 420 mM NaCl. 200 µl of S100 was layered on top of a 10 ml 10-45% glycerol gradient in thin wall polypropylene tubes (from Beckman Coulter). The samples were centrifuged in SW41 rotor at 39,800 rpm for 18 hrs at 4 °C. 330 µl samples were progressively removed from the top and analyzed by SDS-PAGE.

**Cell Proliferation Assays.**  $5 \times 10^5$  cells were plated in 10 cm tissue culture dish on day 0 with or without 1 µg/ml of doxycycline (DOX). Fresh media was changed every 3 days. When cells reached 80% confluency they were trypsinized, stained with trypan blue, and

the number of viable cells was counted using a Countess automated cell counter (Invitrogen). 5% of the total number of viable cells was then replated into a new 10 cm plate and the same procedure was repeated for approximately 4 days, with most cell lines being counted 4-5 times during that period. The cell numbers at each time point for each cell line were normalized to the control cell line for that experiment.

**CRISPR-Based Gene Editing.** Oligonucleotides corresponding to the different sgRNAs were cloned into lentiCRISPRv2 vector (Addgene, plasmid #52961), which expresses Cas9 and contains an sgRNA cloning site. Lentivirus was generated using 293FT cells according to the Broad Institute TRC protocol. After lentivirus infection, the cells were grown in the presence of puromycin. Protein target knockdown was assessed after one or two weeks of puromycin selection. For UMRC2 single clone CRISPR, sgBAF180-3 was cloned into pX330-U6-Chimeric\_BB-CBh-hSpCas9 (a gift from Feng Zhang, Addgene plasmid #42230) between BbsI sites. The plasmid was used to transiently transfect UMRC2 using Lipofectamine LTX with Plus Reagent (15338100, ThermoFisher Scientific). 2 days after transfection the cells were split into 96-well plates for single clone selection. After another 2 weeks, the clones were screened by western blot to identify PBRM1 null cells. The sgRNA sequences used are listed in Supplemental Table 5.

**RNA Interference.** Duplex oligonucleotides corresponding to PBRM1 shRNAs were cloned into Tet-pLKO-puro (Addgene, plasmid #21915). A duplex oligonucleotide corresponding to the control shRNA was cloned into a modified Tet-pLKO-puro (Addgene, plasmid #21915) that contained 200 bp of stuffer DNA 3' of the shRNA multicloning site to

distinguish it from the PBRM1 shRNA vectors in PCR assays. The shRNA sequences used are listed in Supplemental Table 5.

**Nude Mice Subcutaneous Xenograft Assay.** Renal carcinoma cells at 80% confluence were collected by trypsinization. After centrifugation at 300g for 3 min at room temperature the cells were washed twice with ice cold PBS and resuspended in ice cold PBS at a concentration of  $10^7$  cells/ml. Two million cells (200  $\mu$ l) were injected subcutaneously into 5 week-old nude mice using a 29G needle and 0.3mL U-100 syringe (324702, Becton-Dickenson). Tumors were collected 40 to 60 days later.

**Competitive Orthotopic Tumor Growth Assay.**  $2 \times 10^6$  cells consisting of a 1:1 mixture of cells infected to inducibly express a PBRM1 shRNA or control shRNA were injected orthotopically into the renal parenchyma of 5 week-old NOD-SCID mice. The tumors were collected after two months, homogenized in Proteinase K Digestion Buffer (0.1M Tris-HCl, pH.8, 0.2 M NaCl, 5 mM EDTA, 0.4% SDS and 0.2 mg/ml proteinase K) and incubated at 55 °C overnight. Genomic DNA was recovered by phenol-chloroform extraction followed by precipitation with isopropyl alcohol. The DNA pellets were washed with 70% ethanol, dried and resuspended in water. The shRNA coding regions from the two viruses were PCR amplified (see Supplemental Table 6 for primers), separated by agarose electrophoresis, detected with ethidium bromide. Band intensities were measured with Image Lab 5.1 software.

**ChIP-Seq:** A704 cells inducibly expressing either HA-BAF180 or infected with the empty vector were cultured in 15 cm plates and treated with 1 µg/ml of DOX for 9 days. Formaldehyde (F8775, Sigma) was added dropwise into the media to a final concentration of 1% after which the media was incubated at room temperature for 8 min. Glycine was then added to final concentration of 125 mM after which the media was incubated at room temperature for 5 min to quench the formaldehyde. The cells were removed by scraping, transferred to 50 ml conical tubes, and washed twice with ice cold PBS. The cell pellets (50 million cells per condition) were resuspended in 1.25 ml of ChIP-Seq Digestion Buffer (50 mM Tris-HCl, pH 8.0, 1 mM CaCl<sub>2</sub>, 0.2% Triton X-100) plus protease inhibitors and prewarmed in a 37°C water bath for 3min. 6.25 µl of micrococcal nuclease (MNase, M0247S, New England Biolabs) was then added to each sample and incubated at 37°C for 12 min. To stop the reaction, 150 µl of 0.5M EDTA was added into each sample, mixed well and spun down at 1,000g for 5 min at 4°C. The cell pellets were then resuspended in 1.25 ml of SDS ChIP Buffer (20 mM Tris-HCl, pH 8.1, 150 mM NaCl, 1% Triton X-100, 2 mM EDTA, 0.1% SDS) and aliquoted into 5 fresh eppendorf tubes (250 µl each). The cells were then sonicated using a Bioruptor (Diagenode) for 25 min and centrifuged at 18,000g for 15 min. The supernatants were collected and precleared by gentle rocking with 40 µl of protein G sepharose for 3hrs at 4°C. In parallel, anti-HA sepharose (#11815016001, Roche) was washed 4 times with SDS ChIP Buffer. The pre-cleared lysates were transferred to fresh eppendorf tubes and incubated with 30 µl of anti-HA agarose at 4°C overnight. The agarose was washed twice with 1 ml of SDS ChIP Buffer, with each wash consisting of gentle rocking for 10 min at room temperature. The agarose was then washed twice with Wash Buffer 1 (50 mM Hepes, pH 7.5, 300 mM NaCl, 1 mM EDTA, 1% Triton X-100, 0.1%



deoxycholate), with each wash consisting of gentle rocking for 10 min at room temperature, and then washed three times with Wash Buffer 2 (10 mM Tris-HCl, pH 8.1, 250 mM LiCl, 1 mM EDTA, 0.5% NP-40), again with gentle rocking for 10 min per wash at room temperature. The agarose was then washed once with TE Buffer plus 0.2% Triton X-100, washed once with TE Buffer, and then resuspended in 200  $\mu$ l TE plus 3  $\mu$ l 20% SDS and 10  $\mu$ l of 20mg/ml Proteinase K. The resuspended agarose was incubated overnight at 65°C, after which it was spun down and the supernatant was collected. The agarose was then further eluted with 200  $\mu$ l of TE Buffer plus 0.5M NaCl. The supernatant was collected, combined with the supernatant obtained after the overnight incubation in the presence of SDS and Proteinase K at 65°C, and extracted twice with Phenol/Chloroform/Isoamyl Alcohol. The final 300  $\mu$ l samples were ethanol precipitated by adding 30  $\mu$ l of 3M NaAC, pH 5.3, 3  $\mu$ l of 15 mg/ml glycogen and 750  $\mu$ l of cold ethanol and overnight incubation at -80 °C overnight. The DNA precipitates were collected by centrifugation at 18,000g for 10 min at 4°C, washed twice with 70% ethanol, air dried, and resuspended in 40  $\mu$ l TE Buffer. The DNA samples were submitted to Dana-Farber Cancer Institute CCCB for deep sequencing.

**MNase-Seq.** A704 cells inducibly expressing either HA-BAF180 or infected with an empty vector were cultured in 10 cm plates and treated with 1  $\mu$ g/ml of DOX for 9 days. The cells were collected by scraping and washed twice with ice cold PBS. The cell pellets (~2 million cells per sample) were resuspended in 200  $\mu$ l of PBS plus 0.5% Triton X-100 and incubated on ice for 5 min. The nuclei were spun down and resuspended in 200  $\mu$ l of ChIP-Seq Digestion Buffer containing 1  $\mu$ l of MNase and incubated at 37°C for 12 min. The reactions

were stopped by adding 300  $\mu$ l of Stop Buffer (20 mM EDTA, 20 mM EGTA, 0.4% SDS, 0.5 mg/ml Proteinase K). The mixtures were then incubated overnight at 65°C and extracted twice with Phenol/Chloroform /Isoamyl alcohol. The aqueous phase (400  $\mu$ l) was removed and the DNA precipitated by adding 40  $\mu$ l 3M NaAc, pH5.3 and 1.2 ml cold ethanol. The DNA precipitates were spun down, washed twice with 70% ethanol, air dried, resuspended in 50  $\mu$ l of TE buffer, and submitted to Dana-Farber Cancer Institute CCCB for deep sequencing.

**RNA-seq.** Cells were cultured in 6 cm plates to 80% confluence. The media was removed by aspiration and replaced with 1 ml of Trizol reagent (Life Technologies). After incubation for 5 min at room temperature, the Trizol was transferred to an eppendorf tube. 200  $\mu$ l of Chloroform was then added to the Trizol and mixed thoroughly with shaking. After incubation for an additional 5 minutes at room temperature the mixtures were centrifuged at 12,000g for 10 min at 4°C. The supernatant was transferred to a fresh eppendorf tube containing 500  $\mu$ l of isopropanol, mixed well, incubated for 10 min at room temperature, and then centrifuged at 12,000g for 10 min at 4°C. The RNA pellets were washed twice with 70% ethanol, air dried for 10 min, and resuspended in 60  $\mu$ l of RNase-free water. A Turbo DNA-free Kit from Life Technologies was used according to manufacturer's protocol to eliminate residual genomic DNA. The RNA samples were submitted to Dana-Farber Cancer Institute core facility CCCB for RNA-seq analysis.

**Q-PCR:** The RNAs were extracted as described above for RNA Seq except that genomic DNA was removed by adding 1 Unit of DNase I (#18068015, Life Technologies) to 2  $\mu$ g of RNA in

a total volume of 10  $\mu$ l followed by incubation for 15 min at room temperature. 1  $\mu$ l of 25 mM EDTA was then added prior to heating the samples to 65°C for 10 min. AffinityScript QPCR cDNA Synthesis Kit (Agilent) was used for first strand cDNA synthesis according to manufacturer's protocol. Q-PCR was done using Light Cycler 480 Syber Green I master mixture (#04707516001, Roche Diagnostics) as described in Cho et al (26). All mRNA measurements were based on two independent samples and normalized against 18s rRNA. QPCR primers used are listed in Supplemental Table 7.

### **Computational analysis**

The RNA-seq reads were mapped to the human reference genome (GRCh38) using TopHat2 (33). Read counts for each gene were then calculated using HTSeq (34). Differential analysis was performed using DESeq2 (35). The CHIP-seq reads were first mapped to human GRCh38 reference genome using Bowtie2(36) , and the peaks were identified using MACS2 (37). The MNase-seq reads were analyzed as previously described (38) Briefly, all sequenced reads were mapped back to the human reference genome (GRCh38) using Bowtie. Uniquely mapped reads with a maximum of two mismatches were kept for further analysis. To create nucleosome profiles, all mapped reads were extended to 147 bp in their 3' direction, and the middle 73 bp were piled up, as previously described (39).

The Gene Set Enrichment Analysis (GSEA) was performed using the "GSEAPreranked" module of the GenePattern server at Broad Institute\* (<https://genepattern.broadinstitute.org>) (40). Genes are ranked by their differential expression statistics from DESeq2, and the default parameters in the GSEAPreranked module are used.

The expression index measures the overall expression pattern of genes in a pathway in each sample, and was calculated using the previously published approaches (41, 42). Specifically, for all the genes in a pathway, the expression index of each sample is calculated as  $\sum w_i x_i / |w_i|$ , where  $x_i$  is the gene expression of signature gene  $i$  in that sample (measured as  $\log_2(\text{FPKM})$ ), and  $w_i$  is the weight of the gene  $i$ . We use pathway annotations in the MSigDB database of gene set enrichment analysis (GSEA) (43), and set  $w_i = 1$  for genes that are in the same pathway. The expressions of genes in TCGA kidney cancer are extracted from the cBioPortal database (20).

## Supplemental References:

31. Xia W, *et al.* (2008) BAF180 is a critical regulator of p21 induction and a tumor suppressor mutated in breast cancer. *Cancer Res* 68(6):1667-1674.
32. Shen C, *et al.* (2011) Genetic and Functional Studies Implicate HIF1alpha as a 14q Kidney Cancer Suppressor Gene. *Cancer Discov* 1(3):222-235.
33. Kim D, *et al.* (2013) TopHat2: accurate alignment of transcriptomes in the presence of insertions, deletions and gene fusions. *Genome biology* 14(4):R36.
34. Anders S, Pyl PT, & Huber W (2015) HTSeq--a Python framework to work with high-throughput sequencing data. *Bioinformatics* 31(2):166-169.
35. Love MI, Huber W, & Anders S (2014) Moderated estimation of fold change and dispersion for RNA-seq data with DESeq2. *Genome biology* 15(12):550.
36. Langmead B & Salzberg SL (2012) Fast gapped-read alignment with Bowtie 2. *Nat Methods* 9(4):357-359.
37. Zhang Y, *et al.* (2008) Model-based analysis of ChIP-Seq (MACS). *Genome biology* 9(9):R137.
38. Zhang Y, *et al.* (2014) Canonical nucleosome organization at promoters forms during genome activation. *Genome Res* 24(2):260-266.
39. Zhang Y, Shin H, Song JS, Lei Y, & Liu XS (2008) Identifying positioned nucleosomes with epigenetic marks in human from ChIP-Seq. *BMC Genomics* 9:537.
40. Reich M, *et al.* (2006) GenePattern 2.0. *Nat Genet* 38(5):500-501.
41. Hanker AB, *et al.* (2013) Mutant PIK3CA accelerates HER2-driven transgenic mammary tumors and induces resistance to combinations of anti-HER2 therapies. *Proc Natl Acad Sci U S A* 110(35):14372-14377.
42. Lim E, *et al.* (2009) Aberrant luminal progenitors as the candidate target population for basal tumor development in BRCA1 mutation carriers. *Nat Med* 15(8):907-913.
43. Subramanian A, *et al.* (2005) Gene set enrichment analysis: a knowledge-based approach for interpreting genome-wide expression profiles. *Proc Natl Acad Sci U S A* 102(43):15545-15550.

**Supplemental Fig. 1.** Identification of BAF180-Defective Clear Cell Renal Carcinoma Lines.

Immunoblot analyses of the indicated cell lines with a rat anti-BAF180 antibody.

**Supplemental Fig. 2.** Failure of BAF180 to Suppress the Proliferation of Selected ccRCC

Lines. (A and B) Rabbit polyclonal anti-BAF180 immunoblot analysis of SKRC20 (A), SLR24 (A), and RCC4 (B) cells infected to produce the indicated BAF180 variants (see Fig. 1C) in a DOX-inducible manner compared to 786-O cells. (C-E) Proliferation of ccRCC derivatives as in (A and B) grown in the presence or absence of DOX. For each line values were normalized to the untreated (no DOX) samples at each time point for that line.

**Supplemental Fig. 3.** Suppression of ccRCC Line Proliferation is Cell Line Specific.

(A) Schematic of two component system used for DOX-inducible mRNA expression in panels that follow. (B and E) Rabbit polyclonal anti-BAF180 immunoblot analysis of SLR24 (B), A704 (B), and Caki-2 (E) cells infected to produce the indicated BAF180 variants (see Fig. 1C) in a DOX-inducible manner compared to 293FT cells. Note that the expression of the Q1298\* variant was not completely suppressed in the absence of DOX in (E). (C, D, and F). Proliferation of ccRCC derivatives as in (B and E) grown in the presence or absence of DOX. For each line values were normalized to the untreated samples at each time point for that line.

**Supplemental Fig. 4.** Identification of Effective PBRM1 shRNAs. (A and C) Immunoblot analysis of 786-O cells infected with a lentivirus encoding the indicated shRNAs under the control of a DOX-inducible promoter. Where indicated cells were grown in the presence of DOX for 5 days (A) or 17 days (C). (B) Relative cell proliferation of cells as in (A). At each time point cell numbers were normalized to the values for the control shRNA cells at T=0 grown in the absence of DOX. (D). Bar graph showing decrease in cell growth of 786-O cells expressing DOX-inducible shRNAs as in (C) for 17 days. Values represent the difference in cell number (No DOX-DOX) normalized to the No DOX value for that line.

**Supplemental Fig. 5.** Failure of PBRM1 shRNA to Increase Proliferation of SN12C Cells. (A) Immunoblot analysis of SN12C infected with a lentivirus stably expressing a PBRM1 shRNA or control shRNA. (B) Cell proliferation of cells as in (A).

**Supplemental Fig. 6.** On-target Suppression of UMRC2 Cell Proliferation with PBRM1 shRNA. (A) Relative cell proliferation of UMRC2 cells as in Fig. 4A. For each cell line the value at each time point for the DOX-treated cells was normalized using the corresponding untreated cells. (B) Immunoblot (top panel) and relative cell proliferation (bottom panel) of UMRC2 cells infected with a lentivirus encoding a DOX-inducible PBRM1 shRNA (clone 131) and then superinfected with a lentivirus encoding an shRNA-resistant BAF180 cDNA. Cell proliferation data were representative of two independent experiments in which cells were or were not treated with DOX for 16 days. All the values were expressed relative to the EV cells grown in the absence of DOX.

**Supplemental Fig. 7.** CRISPR-Cas9 Mediated Inactivation of BAF180 Does Not Alter Proliferation of 786-O Cells. Proliferation of 786-O cells as in Fig. 4D. The number of viable cells was counted using a Countess automated cell counter. At each time point the values for the PBRM1 sgRNA cells were normalized to the value for the control sgRNA cells.

**Supplemental Fig 8.** Lack of Consistent Effects of BAF180 on p21. (A-C). Immunoblot analyses of A704 cells infected to produce the BAF180 in a DOX-inducible manner compared to empty vector cells (A) and 786-O cells infected to produce the indicated PBRM1 shRNAs (B and C) grown in the presence or absence of DOX as indicated.

**Supplemental Fig. 9.** BAF180 Does Not Grossly Alter Nucleosomal Positioning. (A and B) MNase signals of A704 cells infected to produce wild-type BAF180 (WT) or with the empty vector (EV)(A) and of UMRC2 parental cells compared to UMRC2 cells engineered to lack BAF180 using CRISPR/Cas9 (Clone4G2) (B). (C). Immunoblot analysis of the cells studied in (B).

**Supplemental Fig. 10.** Heatmap showing mRNAs that are activated (or suppressed) by BAF180, BRG1, and or BRM based on RNA-Seq of A704 cells as in (Fig. 5A)

**Supplemental Fig. 11.** Modulation of HIF-target Gene Expression by BAF180. (A) Immunoblot analysis of A704 cells infected to produce BAF180<sup>WT</sup> in a DOX-inducible manner compared to A704 cells infected with the empty vector (EV) and 786-O cells that underwent CRISPR/Cas9-based gene editing with an sgRNA targeting *PBRM1*, *HIF2A*, or a control sgRNA (B). Levels of the indicated mRNAs, as determined by real-time PCR, in BAF180-proficient A704 (red bars) compared to their isogenic BAF180-defective



counterparts (blue bars). (C). Gene Set Enrichment Analysis (GSEA) of differentially expressed mRNAs regulated by BAF180 in 786-O cells. (D-K). Anti-HA ChIP-Seq and RNA-Seq tracks for the indicated genes from A704 cells infected with a lentivirus encoding HA-tagged wild-type (WT) BAF180 or the empty vector (EV).

**Supplemental Fig. 12.** Prevalance of *VHL* and *PBRM1* Mutations in TCGA ccRCC Dataset.

**Supplemental Fig. 13.** Increased Sensitivity of A704 Cells to HIF2 Inhibitor. Proliferation of the indicated cell lines treated with the HIF2 inhibitor PT2399 relative to vehicle treated cells. For each cell line and at each time point the proliferation of the PT2399-treated cells was expressed relative to the corresponding DMSO-treated cells.

**Supplemental Fig. 14.** DNA sequence of the BAF180 FLAG-HA Knock-in homologous recombination template.

Fig. S1

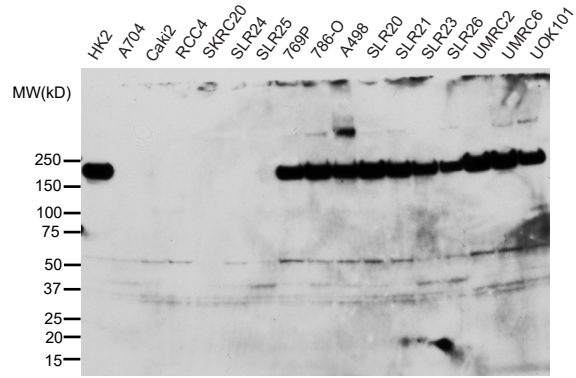

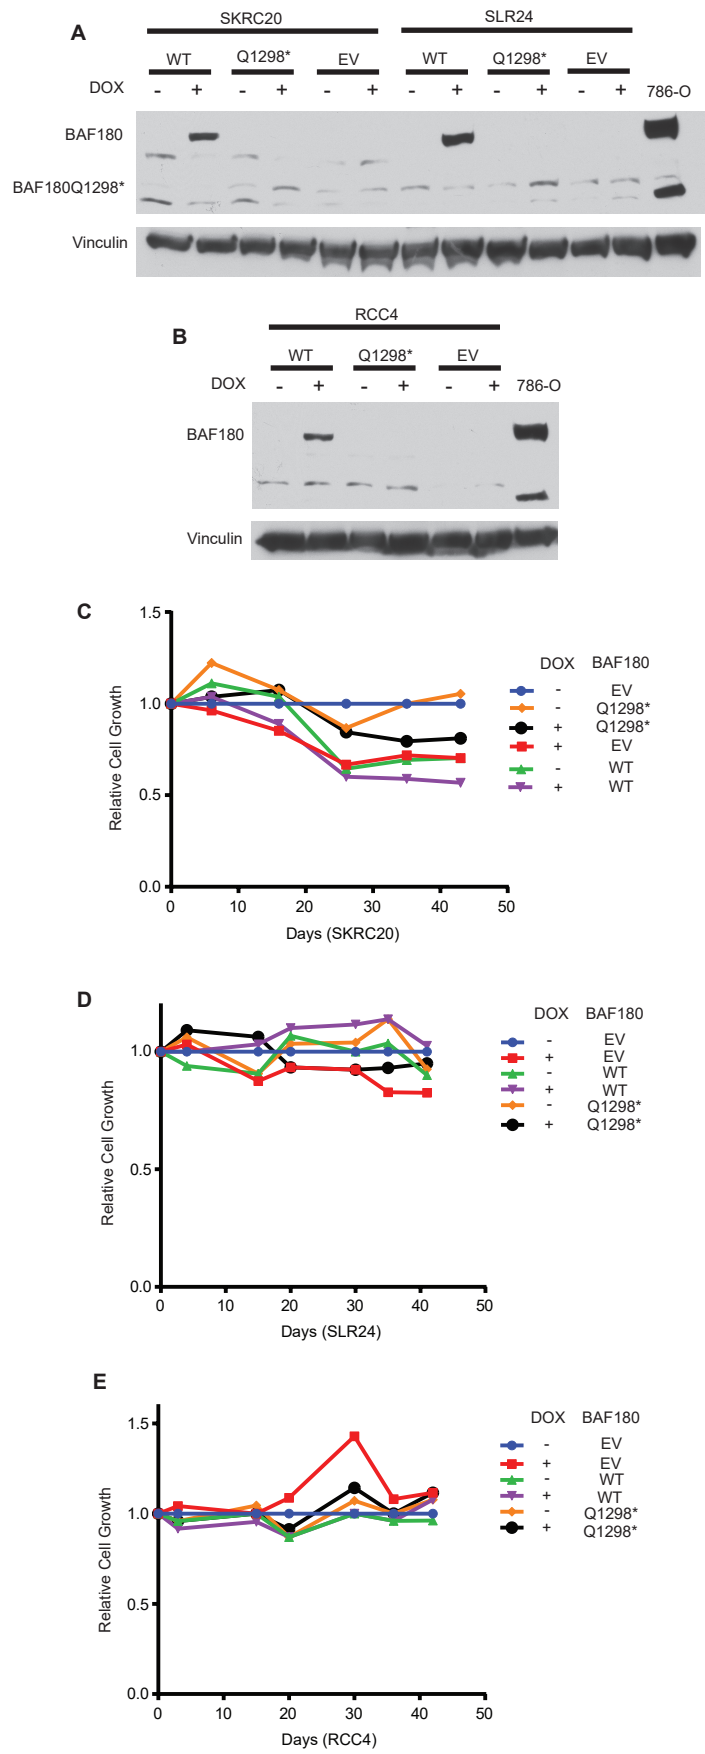

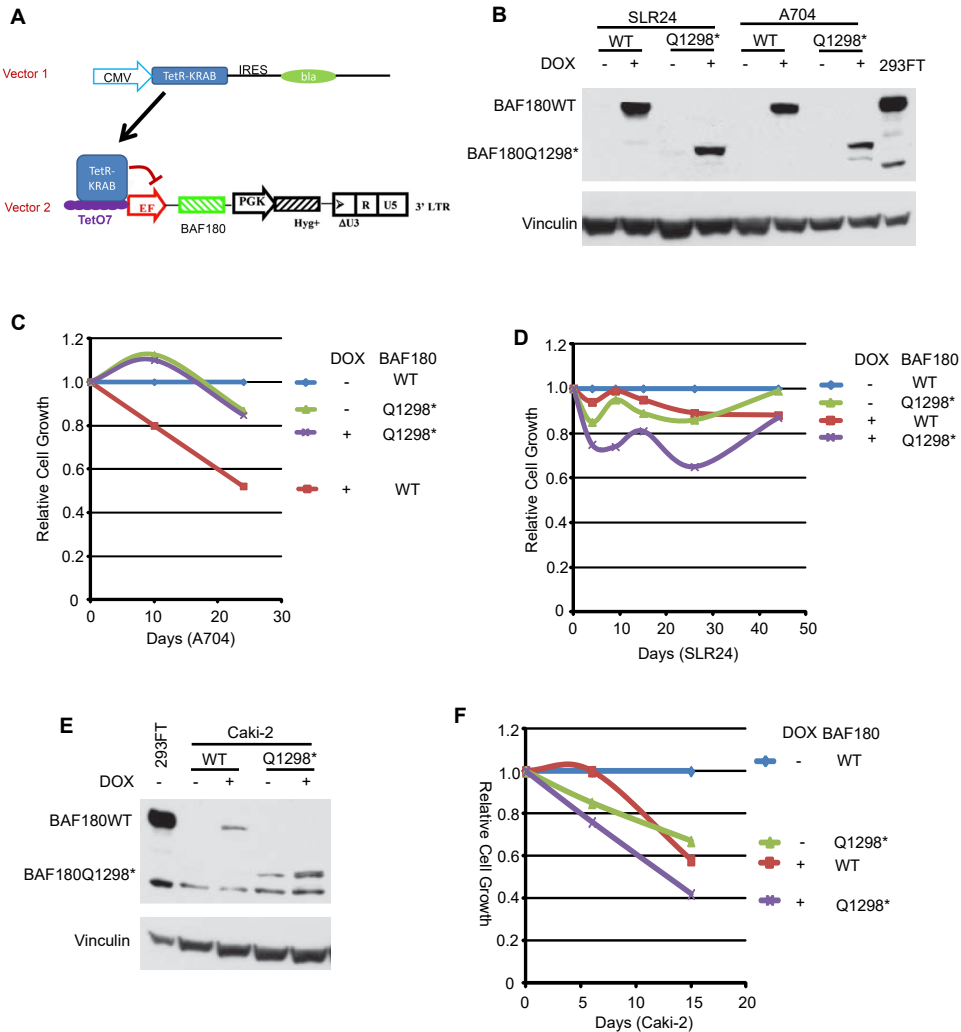

Fig. S4

**A**

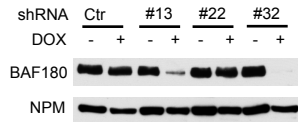

**B**

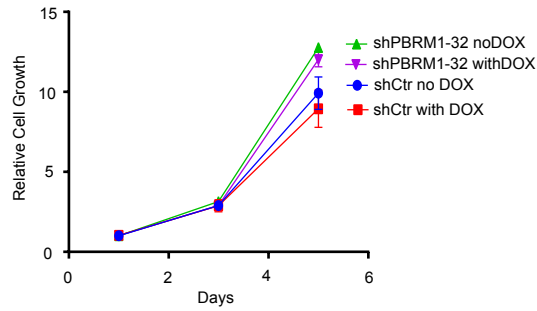

**C**

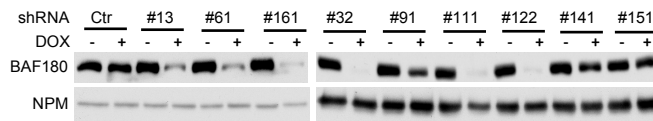

**D**

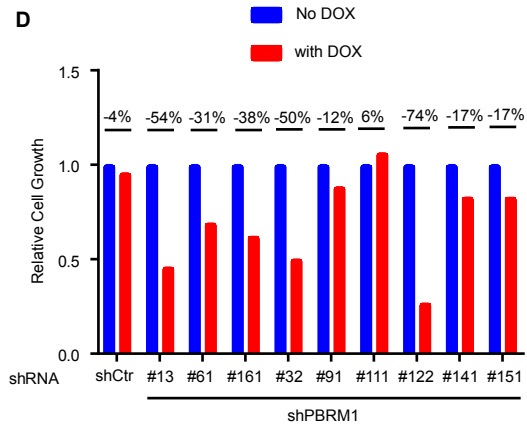

Fig. S5

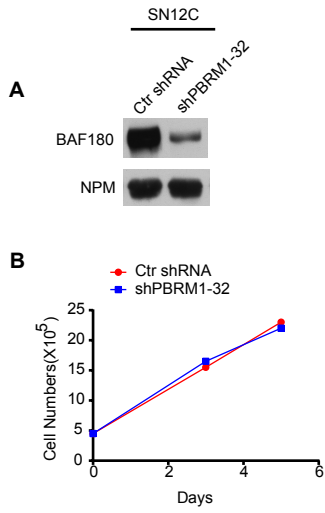

Fig. S6

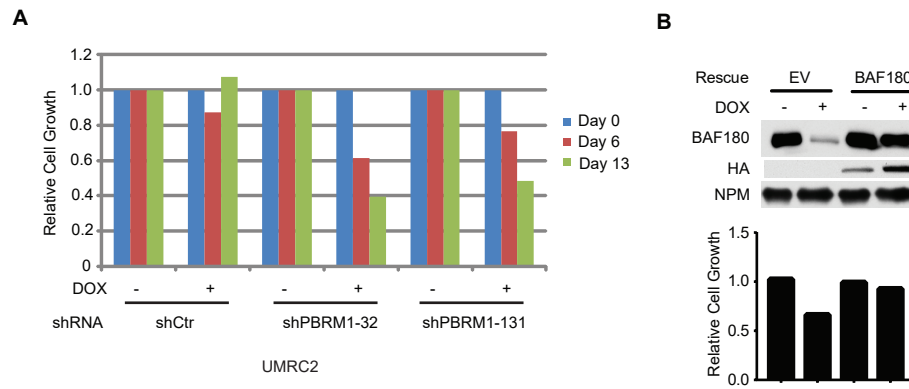

Fig. S7

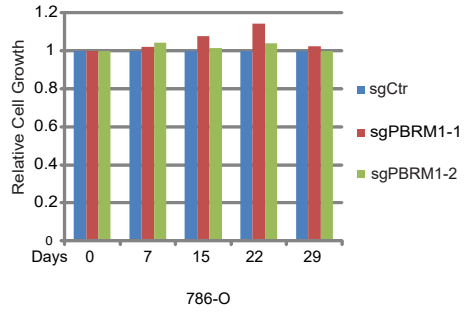



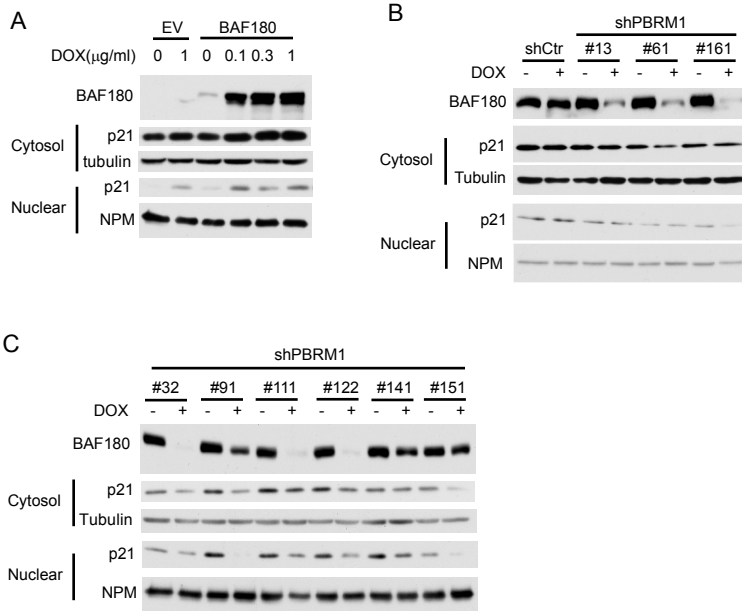

Fig. S9

**A**

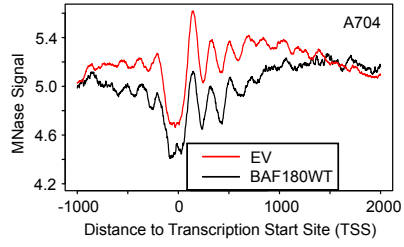

**B**

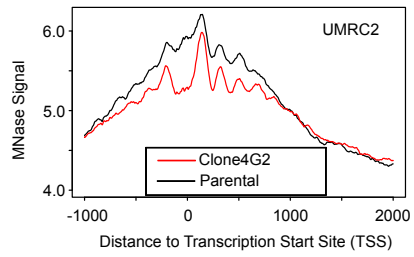

**C**

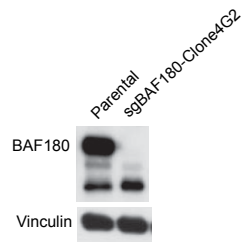

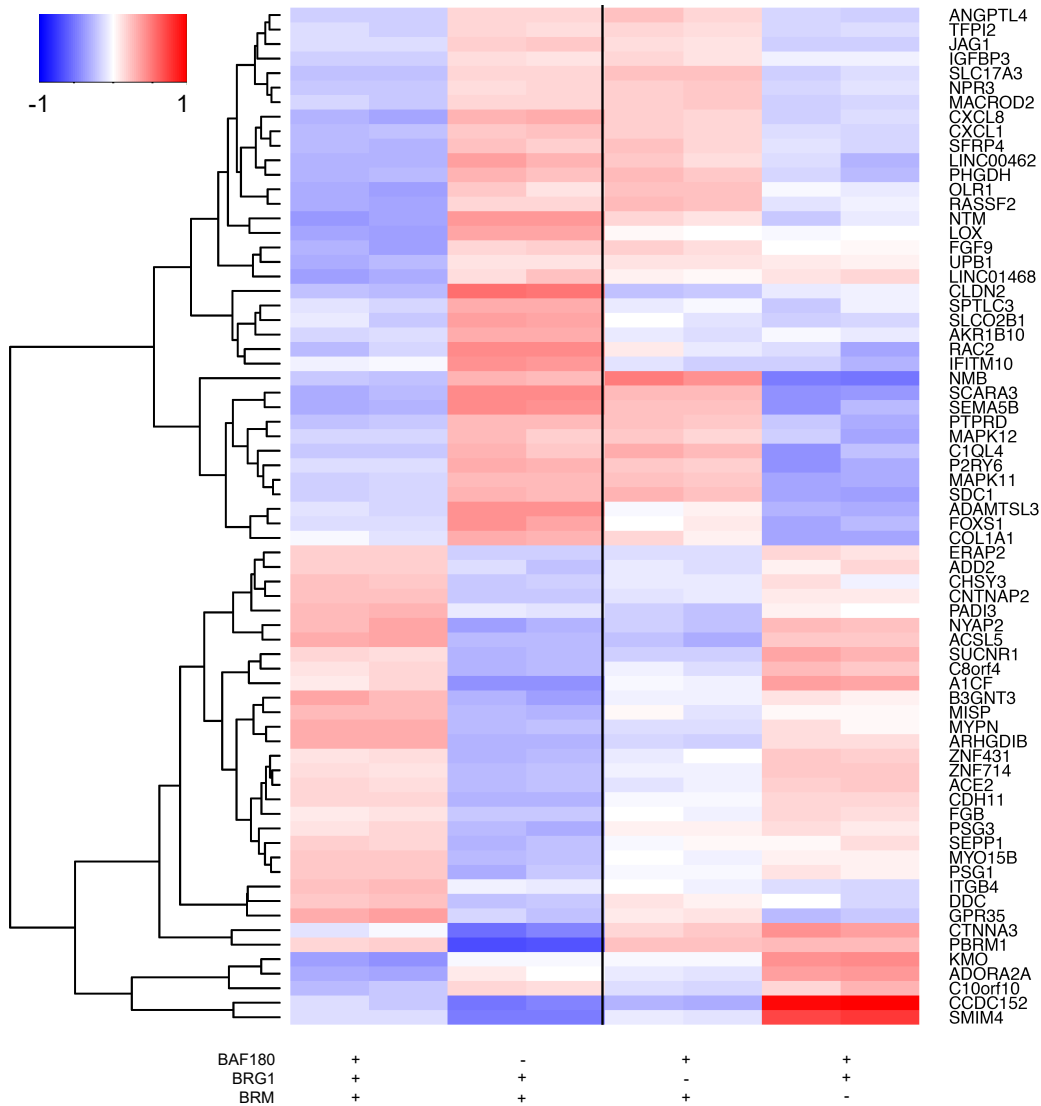

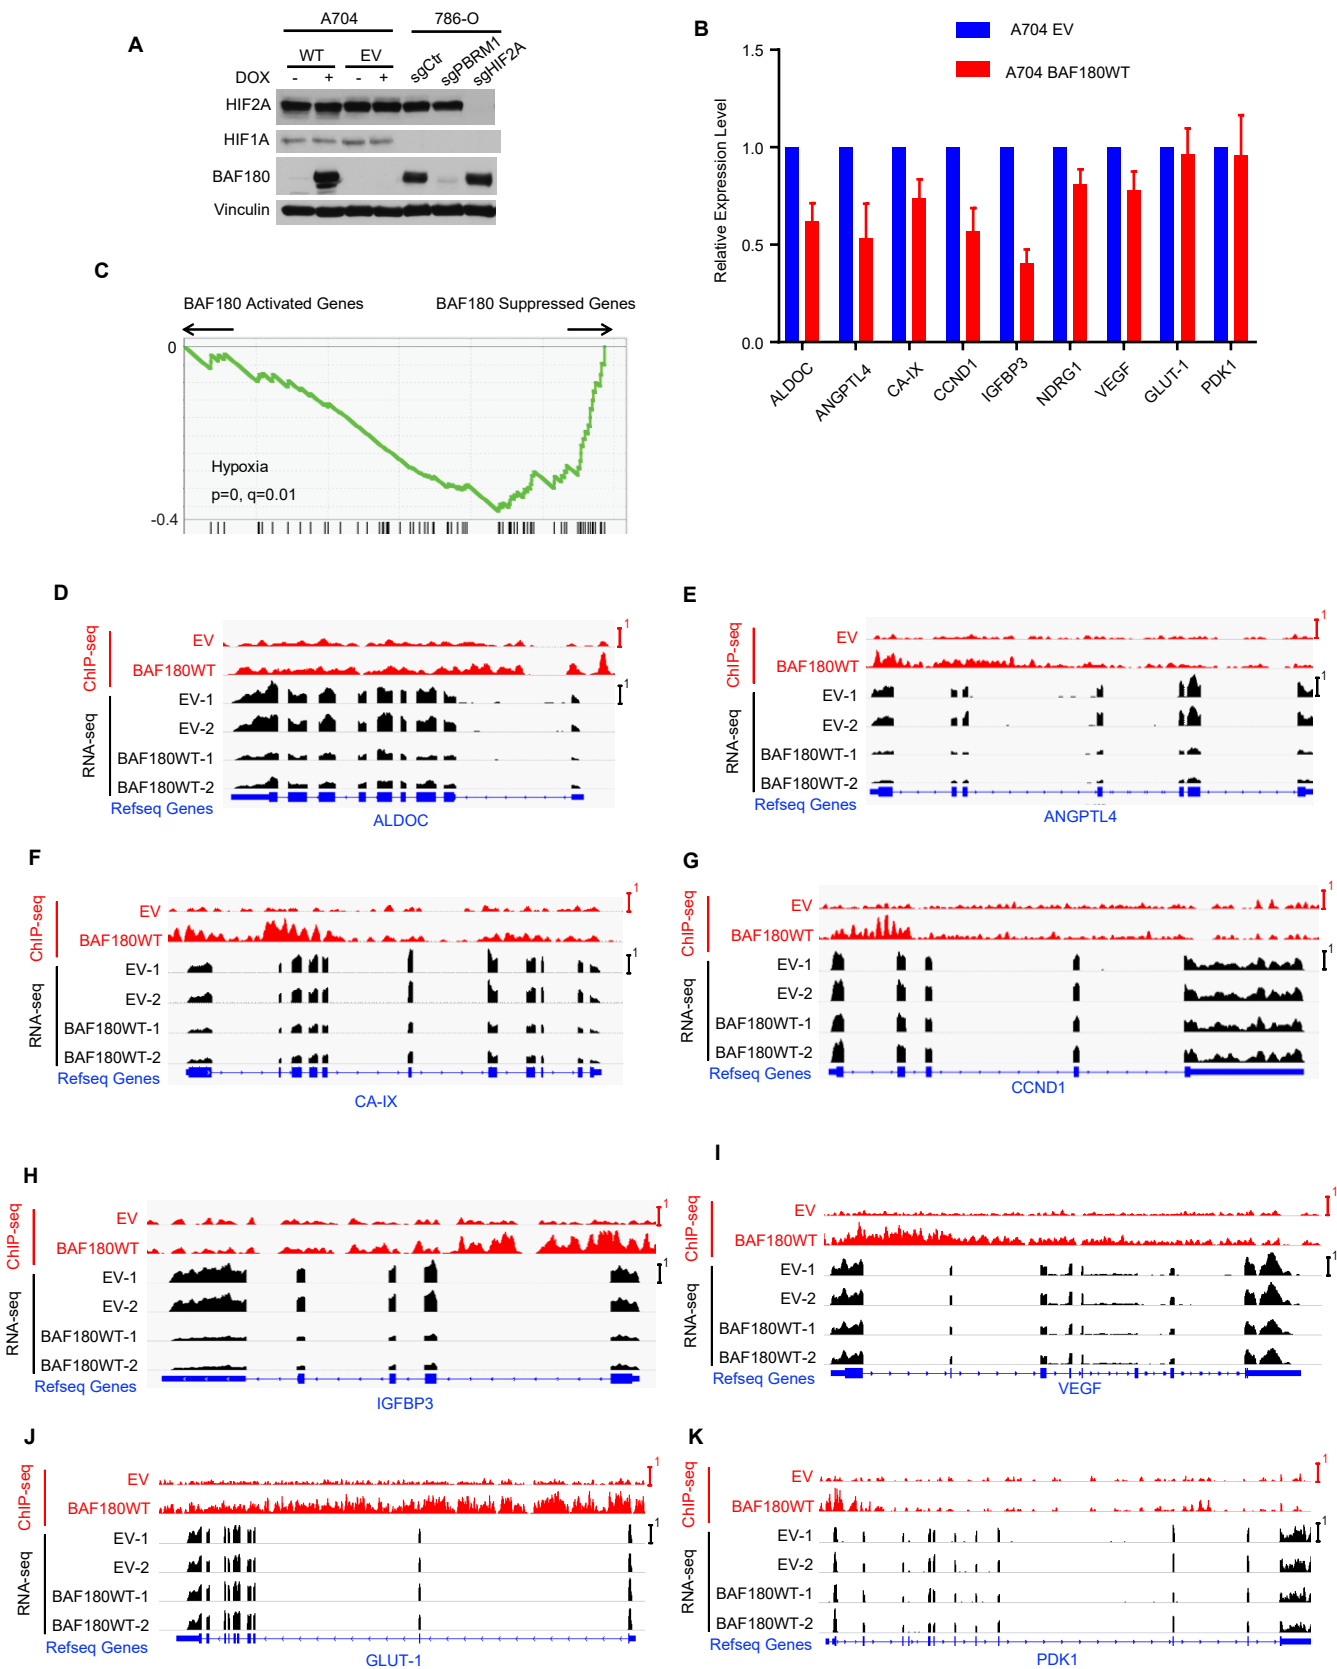

Fig. S12

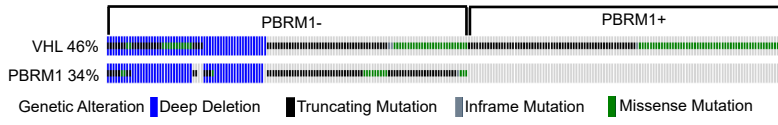

Fig. S13

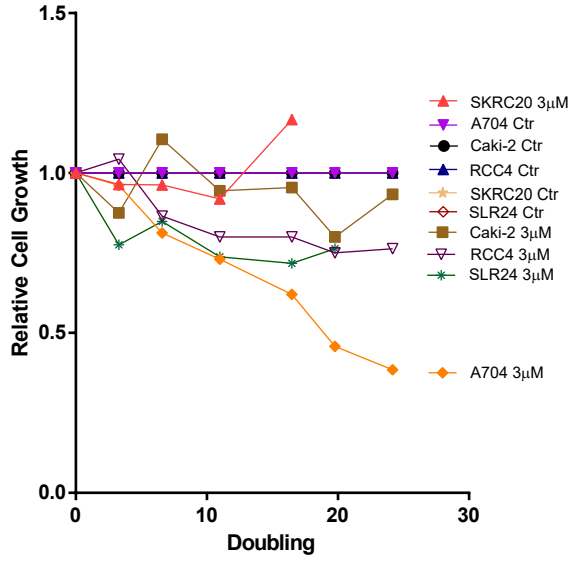

Fig. S14. DNA sequence of the BAF180 FLAG-HA Knock-in homologous recombination template:

CMV-TK-pA

BAF180 Intron

FLAG-HA

BAF180 Exon

loxP-PGK-puro-2A-EGFP-pA-loxP

AGCTTGCATGCCTGCAGGTCAATTCCCTGGCATTATGCCAGTACATGACCTTATGGGACTTTCC  
TACTTGGCAGTACATCTACGTATTAGTCATCGCTATTACCATGGTGATGCGGTTTTGGCAGTACA  
TCAATGGGCGTGGATAGCGGTTTGA CTACGCGGATTTnCAAGTCTCCACCCATTGACGTCAAT  
GGGAGTTTGT TTTGGCACAAAATCAACGGGACTTTCCAAAATGTCGTAACA ACTCCGCCCCATT  
GACGCAAATGGGCGGTAGGCGTGTACGGTGGGAGGTCTATATAAGCAGAGCTCGTTTAGTGAAC  
CGTCAGATCGCCTGGAGACGCCATCCACGCTGTTTTGACCTCCATAGAAGACACCGGGACCGATC  
CAGCCTGGGGATCCCGACcATGGCTTCGTACCCCTGCCATCAACACGCGTCTGCGTTTCGACCAGGC  
TGCGCGTTCTCGCGGCCATAGCAACCGACGTACGGCGTTGCGCCCTCGCCGGCAGCAAGAAGCCA  
CGGAAGTCCGCCTGGAGCAGAAAATGCCACGCTACTGCGGGTTTATATAGACGGTCCTCACGGG  
ATGGGGAAAACCACCACCACGCAACTGCTGGTGGCCCTGGGTTTCGCGCGACGATATCGTCTACGT  
ACCCGAGCCGATGACTTACTGGCAGGTGCTGGGGGCTTCGAGACAATCGCGAACATCTACACCA  
CACAACACCGCCTCGACCAGGGTGAGATATCGGCCGGGACGCGGCGGTGGTAATGACAAGCGCC  
CAGATAACAATGGGCATGCCTTATGCCGTGACCGACGCGGTTCTGGCTCCTCATATCGGGGGGGA  
GGCTGGGAGCTCACATGCCCGCCCCGGCCCTCACCTCATCTTCGACCGCCATCCCATCGCCGC  
CCTCCTGTGCTACCCGGCCGCGGATACCTTATGGGCAGCATGACCCCCAGGCCGTGCTGGCGTT  
CGTGGCCCTCATCCCGCCGACCTTGCCCGGCACAAACATCGTGTTGGGGGCCCTTCCGGAGGACA  
GACACATCGACCGCCTGGCCAAACGCCAGCGCCCCGGCGAGCGGCTTGACCTGGCTATGCTGGCC  
GCGATTGCGCCGCTTACGGGCTGCTTGCCAATACGGTGCGGTATCTGCAGGGCGGCGGGTCTGTG  
GCGGGAGGATTGGGGACAGCTTTCGGGGACGGCCGTGCCGCCCCAGGGTGCCGAGCCCAGAGCA  
ACGCGGGCCCACGACCCCATATCGGGGACACGTTATTTACCCTGTTTCGGGGCCCCGAGTTGCTG  
GCCCCAACGGCGACCTGTACAACGTGTTTGCCTGGGCCTTGACGTCTTGGCCAAACGCCTCCG  
TCCCATGCACGTCTTTATCCTGGATTACGACCAATCGCCCGCGGCTGCCGGGACGCCCTGCTGCA  
ACTTACCTCCGGGATGGTCCAGACCCACGTCACCACCCCGGCTCCATACCGACGATCTGCGACCT  
GGCGCGCACGTTTGCCCGGGAGATGGGGGAGGCTAACTGAGGATCCCACGTCACTATTGTATACT  
CTATATTATACTCTATGTTATACTCTGTAATCCTACTCAATAAACGTGTCACGCCTGTGAAACCG  
TACTAAGTCTCCCGTGTCTTCTTATCACCATCAGGTGACATCCTCGCCCAGGCTGTCAATCATGC  
CGGTATCGATTCCAGTAGCACCGGCCACGCTGACAACCCACTCTTGCAGCGTTAGCAGCGCCCC  
TCTTAACAAGCCGACCCCAACAGCGTCGCGGTTACTAACACTCCTCTCCCCGACCTGCAGCCCA  
TCATTCAGTGCTGCATTCTTGTGTTGTAATAGAGTTATAGTTAAAATTGTTATAGTTAAAT

AGAGTACGTGTTATAGTTAGAGTATGTCATATCACTAAAAGGTGATTAGTTTGAATTAACAGAA  
GAGTTTCAAAGGATAGTTTGTACCTCTGTCTAGGTATAGCAAGTCTCATTAAAGTGTTCAGG  
GATATGCTTCTGGATCCTGTTTAAATGAATGGAGAACATTCATTTTCAGGGTTTTAATTTTAG  
AGTACATCTAAAGTGCTAGAAGGTTAATTGTCCTCTGTCCCTTACCTTTTTCAGTACTCATT  
GTCCTGGGCTCTGCTTCTTGCTCTTTCCACATGATGGCCACCTAGCAAATGATCATAATTGTA  
AGGCACATAGAGAACCAGATGAGGTGCTGACTCCAGAGGTGGATACCTTGGGGCTCTGTACCC  
AGGCCTGCCTGACTGCCTCATGGGCTGAAGGCTTAATACCTTCAGCACACTAATGACTGCTACA  
TATAGGTTGGGAACTCTAGGCCAAATTTGGAGCCAGAAGTTGAGTCATTCAAGATTGCTGATA  
TACAAATGAATATGCTTTTGTGTAATTTGTCCCATCAAATTTGGAAGTATAGCATTCTGGTAAG  
TGAAAGACTAAAACAAGGAAGTCCAGGGCTTAAAAAAAAAAAAAAAAAACTTATAGCTAGTTAACT  
ACAACACGTTAAAATATCCTCCTAAGTGAGCCAGGAGTTGGTAGCAGGTGTCCAGCTGAAGAC  
TTGGTGACAGAGTCTATTTAAATGTAAGAACATGGCTGATTATTTCTTATAGAAGaagttggattcca  
tgGACTACAAAGACGATGACGACAAGTACCCATACGATGTTCCAGATTACGCTggtccaagagaagaa  
gagctacctccccctccagcagtgctcagcggggactttgatgatgggcaccattctgtgtcaacaccaggcccaagcaggaaaagg  
aggagactttccaactctccaactgtagatctGTGAGTAACTTGGATTACATGGGGACAACTTTATTATACA  
AAGTTGTTGTCTGCTCTGACCCGACCATCataactcgtataatgtatgctatacgaagttatccatagagcccaccgc  
atccccagcatgctgctattgtcttccaatcctcccccttgctgtcctgccccacccccccagaatagaatgacacctactca  
gacaatgcgatgcaatttctcattttattaggaaaggacagtgaggagtgccacctccagggtcaaggaaggcacgggggagggg  
caaacaacagatggctggcaactagaaggcacagttaCTTGTACAGCTCGTCCATGCCGAGAGTGATCCCGCG  
GCGGTCACGAACTCCAGCAGGACCATGTGATCGCGCTTCTCGTTGGGGTCTTTGCTCAGGGCGGA  
CTGGGTGCTCAGGTAGTGGTTGTCGGGCAGCAGCACGGGGCCGTCGCCGATGGGGGTGTTCTGCT  
GGTAGTGGTCGGCGAGCTGCACGCTGCCGTCCTCGATGTTGTGGCGGATCTTGAAGTTCACCTTG  
ATGCCGTTCTTCTGCTTGTGCGGCCATGATATAGACGTTGTGGCTGTTGTAGTTGTACTIONCAGCTT  
GTGCCCCAGGATGTTGCCGTCCTCCTTGAAGTCGATGCCCTTCAGCTCGATGCGGTTACCAGGG  
TGTCGCCCTCGAACTTCACCTCGGCGGGGTCTTGTAGTTGCCGTCGCTTGAAGAAGATGGTG  
CGCTCCTGGACGTAGCCTTCGGGCATGGCGGACTTGAAGAAGTCGTGCTGTTTCATGTGGTGGG  
GTAGCGGCTGAAGCACTGCACGCCGTAGGTGAGGTTGGTACGAGGTTGGGCCAGGGCACGGGA  
GCTTGCCGGTGGTGCAGATGAACTTCAGGGTCAGCTTGCCGTAGGTGGCATCGCCCTCGCCCTCG  
CCGACACGCTGAACTTGTGGCCGTTTACGTCGCCGTCAGCTCGACCAGGATGGGCACCACCCC  
GGTGAACAGCTCCTCGCCCTTGCTCACTGGGCCAGGATTCTCCTCGACGTCACCGCATGTTAGCA  
GACTTCCTCTGCCCTCTCCACTGCCggcaccgggcttgccgggtcatgcaccaggtgcccgggtccttcgggcacctcgac  
gtcggcggtgacgggtgaagccgagccgctcgtagaaggggaggttgccggggcgccggaggctccaggaaggcgggcacccccggc  
gcgctcggccgctccactccggggagcacgacggcgctgcccagacccttgccctggtggtcgggcgagacgcccagcgggtggcc  
aggaaccacgcccggctccttgggccggtgcccggccaggaggccttccatctgttgctgcccggccagccgggaaccgctcaactc  
ggccatgcccgggcccgatctcggcgaacaccgccccgcttcgacgctctccggcggtggtccagaccgcccggcgccgctcgt  
ccgacccacaccttgccgatgctgagcccagcgcgctgaggaagagtcttcagctcggtgaccgctcgatgtggcggtccg  
gatcgacggtgtggcgctggcggggtagtcggcgaacgcccggcgagggtgctacggccctggggacgctcgtcgggggtggc  
gaggcgaccgtgggcttgactcgggtCATGGTAAGCTTGGGCTGCAGGTCGAAAGGCCGGAGATGAGGA  
AGAGGAGAACAGCGCGGCAGACGTGCGCTTTTGAAGCGTGCAGAATGCCGGGCCTCCGGAGGACC



TTCGGGGCGCCCGCCCGCCCTGAGCCCGCCCTGAGCCCGCCCGGACCCACCCCTTCCCAGCCT  
CTGAGCCCAGAAAGCGAAGGAGCAAAGCTGCTATTGGCCGCTGCCCCAAAGGCCTACCCGCTTCC  
ATTGCTCAGCGGTGCTGTCCATCTGCACGAGACTAGTGAGACGTGCTACTTCCATTTGTCACGTC  
CTGCACGACGCGAGCTGCGGGGCGGGGGGAACTTCCTGACTAGGGGAGGAGTAGAAGGTGGCG  
CGAAGGGGCCACCAAAGAACGGAGCCGGTTGGCGCCTACCGGataacttcgtataatgtatgctatacgaagt  
atccttggatgccgtacgctgatCAACTTTGTATAGAAAAGTTGTCCCCGTTTCTGCCTGCTCTTCCCACAA  
TTCCCCTATCTTCCCTTTAATGGTAAAATTGTTACGATGCAAGGCATCTCCACTTTTTTAAGATT  
CTCTTGATTAATAGTCTTTCTTTTATGAACATTATGTATTCAGCTAAGTCTTAGAGTAATAGT  
GTGATCTTATGAATAATTTAGTATGTTACATCATATATTAATTCAGCAAATAACTGTGTGACT  
ATCATGTGACAAGCACTGTTCTCATGGTTGGGATATAGCCATGTGGGAAACAAGCCCATTTTTTCA  
CATGGAACTTAGATTCCAGGCGGGGGAAGTAGAATGTAAACAAGTAAACGAATAAAGAATAATG  
TATCCTTAGCTAGTAATAAGTGCTAAGAAGAAAATTTGGGTGATTTGGGCTGTTTTGGCCTGA  
ATTCGCTGGAAGAGAGTTCAGACAGAACCAGTGCAGAGGGGTTGGGTCAGGGATGAGTTTGT  
GTGTCTTGGTTACAGAGCAGGGATGGTCAGGAAGGAGAAGGAAACTGGCAAGCTCCACCCATT  
CAGAGTATGTAGGGCCACACAAGCAATGTTTGGAGTTTAGATTTTATTCTCTGTGAAGTGATA  
AACCTTCTGTCAGATGGCTTTAAGCAAGAGAGTGATAAACTGATTTAGTTTCAAAGAAGAAAA  
CCCTTCAATTGGATGACTTTAAGCAAGAAAGTGATGAACTGATATAGTTTAGAAGACAAAATCA  
CCAGGAGCATAAATCTGATGAAAGATACCAAAAAGTTAGTCAACTCAGTTGTTTGAAAGGAGAC  
ATATTGTCAGCATATTTAGACTTTAGCATGTTTGGTAATATTGAGAGTCATCATTTTTCTTCTC  
TACTTGCCTTTTATTGAAGAGTAGAAAATAATCTTATGTCTACACTGGCTTCTGTTCACTTTT  
TTAGTGATTTTTTCTCCTTTGCTAATGTGTAGATTGCCGTGTGCCATGAACTCTATAATACCAT  
CCGAGACTATAAGGATGAACAGGGCAGACTTCTCTGTGAGCTCTTCATTAGGGCACCAAAGCGAA  
GGTGACTTCGAAGC

Table S1. Proteins Identified by Mass Spectrometry in Different Cell Lines as Shown in Fig. 2

| IP Mass Spec Proteins in 786-O |       |                     |             |        |
|--------------------------------|-------|---------------------|-------------|--------|
| Unique                         | Total | reference           | Gene Symbol | AVG    |
| 13                             | 15    | Q9Y2W1_TR150_HUMAN  | THRAP3      | 2.5283 |
| 9                              | 9     | P11387_TOP1_HUMAN   | TOP1        | 2.4151 |
| 8                              | 8     | P23246_SFPQ_HUMAN   | SFPQ        | 3.2386 |
| 7                              | 29    | IGKC_MOUSE          |             | 2.8303 |
| 6                              | 9     | Q9NYF8_BCLF1_HUMAN  | BCLAF1      | 3.0831 |
| 6                              | 6     | P11182_ODB2_HUMAN   | DBT         | 2.7257 |
| 5                              | 13    | IGH1M_MOUSE         | Ighg1       | 3.0134 |
| 5                              | 7     | IGHM_MOUSE          | Igh-6       | 3.1822 |
| 5                              | 5     | Q6UWP8_SBSN_HUMAN   | SBSN        | 3.8606 |
| 4                              | 4     | P04040_CATA_HUMAN   | CAT         | 3.1957 |
| 4                              | 4     | Q6ZVX7_FBX50_HUMAN  | NCCRP1      | 2.7568 |
| 3                              | 5     | Q8IX12_CCAR1_HUMAN  | CCAR1       | 2.5355 |
| 3                              | 4     | P06748_NPM_HUMAN    | NPM1        | 2.5492 |
| 3                              | 3     | HVM27_MOUSE         |             | 3.4837 |
| 3                              | 3     | P19338_NUCL_HUMAN   | NCL         | 2.5834 |
| 3                              | 3     | P07355_ANXA2_HUMAN  | ANXA2       | 2.5205 |
| 3                              | 3     | P68104_EEF1A1_HUMAN | EEF1A1      | 2.4626 |
| 3                              | 3     | P10599_THIO_HUMAN   | TXN         | 2.1513 |
| 2                              | 6     | KV2A7_MOUSE         |             | 2.9263 |
| 2                              | 4     | O14786_NRP1_HUMAN   | NRP1        | 3.8512 |
| 2                              | 3     | P51991_ROA3_HUMAN   | HNRNPA3     | 2.5589 |
| 2                              | 3     | O75223_GGCT_HUMAN   | GGCT        | 2.1911 |
| 2                              | 2     | Q9HCY8_S10AE_HUMAN  | S100A14     | 3.497  |
| 2                              | 2     | P62736_ACTA_HUMAN   | ACTA2       | 3.0297 |
| 2                              | 2     | P62987_RL40_HUMAN   | UBA52       | 2.9815 |
| 2                              | 2     | P62753_RS6_HUMAN    | RPS6        | 2.9039 |
| 2                              | 2     | IGHG3_MOUSE         |             | 2.6884 |
| 2                              | 2     | Q02878_RL6_HUMAN    | RPL6        | 2.6044 |
| 2                              | 2     | O75533_SF3B1_HUMAN  | SF3B1       | 2.5284 |
| 2                              | 2     | Q00839_HNRPU_HUMAN  | HNRNPU      | 2.4796 |
| 2                              | 2     | Q9NR30_DDX21_HUMAN  | DDX21       | 2.4489 |
| 2                              | 2     | P62263_RS14_HUMAN   | RPS14       | 2.3859 |
| 2                              | 2     | Q15233_NONO_HUMAN   | NONO        | 2.343  |
| 2                              | 2     | P22626_ROA2_HUMAN   | HNRNPA2B1   | 2.0091 |
| 2                              | 2     | P36578_RL4_HUMAN    | RPL4        | 1.9971 |
| 2                              | 2     | Q7Z478_DHX29_HUMAN  | DHX29       | 1.9621 |
| 2                              | 2     | Q13435_SF3B2_HUMAN  | SF3B2       | 1.8396 |
| 1                              | 30    | P05067_A4_HUMAN     | APP         | 3.2043 |
| 1                              | 2     | P05387_RLA2_HUMAN   | RPLP2       | 4.0805 |
| 1                              | 2     | P05386_RLA1_HUMAN   | RPLP1       | 4.032  |
| 1                              | 2     | Q15517_CDSN_HUMAN   | CDSN        | 3.2628 |

|   |   |                    |          |        |
|---|---|--------------------|----------|--------|
| 1 | 2 | P63173_RL38_HUMAN  | RPL38    | 3.0967 |
| 1 | 2 | Q96HS1_PGAM5_HUMAN | PGAM5    | 2.8005 |
| 1 | 2 | SjGST_Schistosoma  |          | 2.149  |
| 1 | 2 | P15311_EZRI_HUMAN  | EZR      | 2.0666 |
| 1 | 2 | Q7Z417_NUFP2_HUMAN | NUFIP2   | 1.9087 |
| 1 | 1 | Q13867_BLMH_HUMAN  | BLMH     | 5.0387 |
| 1 | 1 | Q16610_ECM1_HUMAN  | ECM1     | 3.792  |
| 1 | 1 | P67809_YBOX1_HUMAN | YBX1     | 3.6917 |
| 1 | 1 | Q9UH99_SUN2_HUMAN  | SUN2     | 3.6246 |
| 1 | 1 | P54792_DVLP1_HUMAN | DVL1P1   | 3.5738 |
| 1 | 1 | P46821_MAP1B_HUMAN | MAP1B    | 3.4186 |
| 1 | 1 | Q9H3D4_P63_HUMAN   | TP63     | 3.261  |
| 1 | 1 | P11142_HSP7C_HUMAN | HSPA8    | 3.2268 |
| 1 | 1 | IgG1_bovine        |          | 3.0331 |
| 1 | 1 | P47914_RL29_HUMAN  | RPL29    | 3.0107 |
| 1 | 1 | P19474_RO52_HUMAN  | TRIM21   | 2.9487 |
| 1 | 1 | Q07065_CKAP4_HUMAN | CKAP4    | 2.666  |
| 1 | 1 | O60506_HNRPQ_HUMAN | SYNCRIP  | 2.6593 |
| 1 | 1 | Q02539_H11_HUMAN   | HIST1H1A | 2.6295 |
| 1 | 1 | P62917_RL8_HUMAN   | RPL8     | 2.6261 |
| 1 | 1 | Q86YP4_P66A_HUMAN  | GATAD2A  | 2.6003 |
| 1 | 1 | Q14839_CHD4_HUMAN  | CHD4     | 2.5478 |
| 1 | 1 | O95232_LC7L3_HUMAN | LUC7L3   | 2.5181 |
| 1 | 1 | P39023_RL3_HUMAN   | RPL3     | 2.3928 |
| 1 | 1 | P07900_HS90A_HUMAN | HSP90AA1 | 2.392  |
| 1 | 1 | Q9UNX3_RL26L_HUMAN | RPL26L1  | 2.3827 |
| 1 | 1 | P16401_H15_HUMAN   | HIST1H1B | 2.3391 |
| 1 | 1 | O75635_SPB7_HUMAN  | SERPINB7 | 2.2902 |
| 1 | 1 | P07437_TBB5_HUMAN  | TUBB     | 2.2873 |
| 1 | 1 | Q96P65_QRFPR_HUMAN | QRFPR    | 2.278  |
| 1 | 1 | P23396_RS3_HUMAN   | RPS3     | 2.2436 |
| 1 | 1 | P35030_TRY3_HUMAN  | PRSS3    | 2.2327 |
| 1 | 1 | P28074_PSB5_HUMAN  | PSMB5    | 2.1962 |
| 1 | 1 | Q9GZS1_RPA49_HUMAN | POLR1E   | 2.1885 |
| 1 | 1 | Q8IXB1_DJC10_HUMAN | DNAJC10  | 2.1825 |
| 1 | 1 | Q15828_CYTM_HUMAN  | CST6     | 2.165  |
| 1 | 1 | P84103_SRSF3_HUMAN | SRSF3    | 2.1541 |
| 1 | 1 | P02545_LMNA_HUMAN  | LMNA     | 2.1278 |
| 1 | 1 | Q14568_HS902_HUMAN | HSP90AA2 | 2.0943 |
| 1 | 1 | P11279_LAMP1_HUMAN | LAMP1    | 2.0521 |
| 1 | 1 | Q12906_ILF3_HUMAN  | ILF3     | 2.0465 |
| 1 | 1 | P32119_PRDX2_HUMAN | PRDX2    | 1.9705 |
| 1 | 1 | Q6NVV1_R13P3_HUMAN | RPL13AP3 | 1.9644 |
| 1 | 1 | P38646_GRP75_HUMAN | HSPA9    | 1.9023 |

**IP Mass Spec Proteins in 786-O-BK1**

| Unique | Total | reference          | Gene Symbol | AVG    |
|--------|-------|--------------------|-------------|--------|
| 92     | 503   | Q86U86_PB1_HUMAN   | PBRM1       | 2.8218 |
| 55     | 204   | Q8TAQ2_SMRC2_HUMAN | SMARCC2     | 3.0684 |
| 51     | 176   | P51531_SMCA2_HUMAN | SMARCA2     | 3.0112 |
| 49     | 163   | Q92922_SMRC1_HUMAN | SMARCC1     | 3.206  |
| 46     | 169   | Q68CP9_ARID2_HUMAN | ARID2       | 3.1321 |
| 42     | 53    | P46013_KI67_HUMAN  | MKI67       | 2.8771 |
| 35     | 82    | P51532_SMCA4_HUMAN | SMARCA4     | 3.2409 |
| 34     | 49    | P11388_TOP2A_HUMAN | TOP2A       | 2.9472 |
| 31     | 139   | Q9NPI1_BRD7_HUMAN  | BRD7        | 3.184  |
| 28     | 38    | Q9NR30_DDX21_HUMAN | DDX21       | 2.9478 |
| 27     | 110   | Q969G3_SMCE1_HUMAN | SMARCE1     | 2.8946 |
| 26     | 30    | Q02880_TOP2B_HUMAN | TOP2B       | 3.0933 |
| 20     | 50    | Q96GM5_SMRD1_HUMAN | SMARCD1     | 3.017  |
| 20     | 21    | Q08211_DHX9_HUMAN  | DHX9        | 2.8281 |
| 19     | 71    | Q8WUB8_PHF10_HUMAN | PHF10       | 3.0336 |
| 18     | 24    | P19338_NUCL_HUMAN  | NCL         | 3.0049 |
| 16     | 36    | Q92925_SMRD2_HUMAN | SMARCD2     | 2.8418 |
| 14     | 47    | O96019_ACL6A_HUMAN | ACTL6A      | 2.782  |
| 14     | 15    | P46087_NOP2_HUMAN  | NOP2        | 2.9216 |
| 13     | 24    | P52292_IMA1_HUMAN  | KPNA2       | 3.1561 |
| 13     | 15    | P18124_RL7_HUMAN   | RPL7        | 2.5242 |
| 13     | 14    | Q14676_MDC1_HUMAN  | MDC1        | 3.4353 |
| 12     | 16    | P11387_TOP1_HUMAN  | TOP1        | 2.2997 |
| 11     | 28    | Q12824_SNF5_HUMAN  | SMARCB1     | 2.6286 |
| 11     | 21    | P36578_RL4_HUMAN   | RPL4        | 2.3317 |
| 11     | 20    | Q13127_REST_HUMAN  | REST        | 2.7965 |
| 11     | 20    | P62701_RS4X_HUMAN  | RPS4X       | 2.6156 |
| 11     | 14    | Q6STE5_SMRD3_HUMAN | SMARCD3     | 3.2784 |
| 11     | 13    | Q14669_TRIPC_HUMAN | TRIP12      | 3.2688 |
| 10     | 38    | P39023_RL3_HUMAN   | RPL3        | 2.7817 |
| 10     | 19    | Q02878_RL6_HUMAN   | RPL6        | 2.5274 |
| 10     | 14    | Q9Y2W1_TR150_HUMAN | THRAP3      | 2.5016 |
| 10     | 13    | P62424_RL7A_HUMAN  | RPL7A       | 2.6929 |
| 10     | 11    | Q07065_CKAP4_HUMAN | CKAP4       | 3.1995 |
| 10     | 10    | O00567_NOP56_HUMAN | NOP56       | 2.5777 |
| 9      | 28    | Q4VC05_BCL7A_HUMAN | BCL7A       | 3.0672 |
| 9      | 16    | P15880_RS2_HUMAN   | RPS2        | 2.3496 |
| 9      | 15    | P46781_RS9_HUMAN   | RPS9        | 2.4412 |
| 9      | 11    | Q99575_POP1_HUMAN  | POP1        | 3.2325 |
| 9      | 11    | P22626_ROA2_HUMAN  | HNRNPA2B1   | 3.0128 |
| 9      | 9     | P38646_GRP75_HUMAN | HSPA9       | 3.5756 |
| 8      | 17    | P23396_RS3_HUMAN   | RPS3        | 2.5766 |
| 8      | 10    | Q00839_HNRPU_HUMAN | HNRNPU      | 2.9276 |
| 8      | 9     | P61247_RS3A_HUMAN  | RPS3A       | 2.4322 |
| 8      | 8     | P11021_GRP78_HUMAN | HSPA5       | 3.826  |

|   |    |                    |          |        |
|---|----|--------------------|----------|--------|
| 7 | 90 | IGKC_MOUSE         |          | 2.912  |
| 7 | 17 | P26373_RL13_HUMAN  | RPL13    | 3.0663 |
| 7 | 17 | P62736_ACTA_HUMAN  | ACTA2    | 2.6544 |
| 7 | 10 | P05387_RLA2_HUMAN  | RPLP2    | 3.5922 |
| 7 | 10 | P62917_RL8_HUMAN   | RPL8     | 2.3188 |
| 7 | 8  | Q9NVP1_DDX18_HUMAN | DDX18    | 2.6492 |
| 7 | 7  | Q8IY81_SPB1_HUMAN  | FTSJ3    | 3.3775 |
| 7 | 7  | O60264_SMCA5_HUMAN | SMARCA5  | 2.9057 |
| 7 | 7  | P11142_HSP7C_HUMAN | HSPA8    | 2.8269 |
| 6 | 16 | P62241_RS8_HUMAN   | RPS8     | 2.5103 |
| 6 | 15 | IGH1M_MOUSE        | Ighg1    | 2.7697 |
| 6 | 11 | IGHM_MOUSE         | Igh-6    | 2.9224 |
| 6 | 9  | P06748_NPM_HUMAN   | NPM1     | 3.1094 |
| 6 | 8  | P52272_HNRPM_HUMAN | HNRNPM   | 2.9015 |
| 6 | 7  | P67809_YBOX1_HUMAN | YBX1     | 3.8734 |
| 6 | 6  | P35251_RFC1_HUMAN  | RFC1     | 3.17   |
| 6 | 6  | Q8IYB3_SRRM1_HUMAN | SRRM1    | 3.0596 |
| 6 | 6  | Q9NW13_RBM28_HUMAN | RBM28    | 2.6255 |
| 6 | 6  | P46778_RL21_HUMAN  | RPL21    | 2.4685 |
| 6 | 6  | P62750_RL23A_HUMAN | RPL23A   | 2.378  |
| 6 | 6  | Q5SSJ5_HP1B3_HUMAN | HP1BP3   | 2.3297 |
| 5 | 14 | P62753_RS6_HUMAN   | RPS6     | 3.5774 |
| 5 | 12 | Q96HS1_PGAM5_HUMAN | PGAM5    | 2.375  |
| 5 | 7  | P61313_RL15_HUMAN  | RPL15    | 2.5994 |
| 5 | 6  | Q8NHW5_RLA0L_HUMAN | RPLP0P6  | 3.1625 |
| 5 | 6  | P62269_RS18_HUMAN  | RPS18    | 3.07   |
| 5 | 6  | P62249_RS16_HUMAN  | RPS16    | 2.5535 |
| 5 | 6  | Q99848_EBP2_HUMAN  | EBNA1BP2 | 2.4254 |
| 5 | 5  | Q8TDN6_BRX1_HUMAN  | BRIX1    | 3.2805 |
| 5 | 5  | Q14839_CHD4_HUMAN  | CHD4     | 3.1742 |
| 5 | 5  | P23246_SFPQ_HUMAN  | SFPQ     | 3.0783 |
| 5 | 5  | Q9NUQ6_SPS2L_HUMAN | SPATS2L  | 3.0183 |
| 5 | 5  | P46777_RL5_HUMAN   | RPL5     | 2.8456 |
| 5 | 5  | P62277_RS13_HUMAN  | RPS13    | 2.6021 |
| 5 | 5  | Q9BZE4_NOG1_HUMAN  | GTPBP4   | 2.5921 |
| 5 | 5  | Q9BQ39_DDX50_HUMAN | DDX50    | 2.3618 |
| 5 | 5  | P18621_RL17_HUMAN  | RPL17    | 2.1196 |
| 4 | 15 | P60709_ACTB_HUMAN  | ACTB     | 3.6641 |
| 4 | 12 | P18077_RL35A_HUMAN | RPL35A   | 1.7926 |
| 4 | 10 | Q8WUZ0_BCL7C_HUMAN | BCL7C    | 3.932  |
| 4 | 7  | P51991_ROA3_HUMAN  | HNRNPA3  | 3.1347 |
| 4 | 5  | Q07020_RL18_HUMAN  | RPL18    | 3.3983 |
| 4 | 5  | Q14690_RRP5_HUMAN  | PDCD11   | 2.7832 |
| 4 | 5  | O60832_DKC1_HUMAN  | DKC1     | 2.6739 |
| 4 | 5  | P49207_RL34_HUMAN  | RPL34    | 2.0639 |
| 4 | 5  | P40429_RL13A_HUMAN | RPL13A   | 1.8756 |
| 4 | 4  | Q12873_CHD3_HUMAN  | CHD3     | 3.0535 |

|   |    |                     |          |        |
|---|----|---------------------|----------|--------|
| 4 | 4  | Q9UH99_SUN2_HUMAN   | SUN2     | 2.9634 |
| 4 | 4  | Q92841_DDX17_HUMAN  | DDX17    | 2.9203 |
| 4 | 4  | Q7Z2W4_ZCCHV_HUMAN  | ZC3HAV1  | 2.8214 |
| 4 | 4  | Q71U36_TBA1A_HUMAN  | TUBA1A   | 2.7893 |
| 4 | 4  | P62266_RS23_HUMAN   | RPS23    | 2.7456 |
| 4 | 4  | P17480_UBF1_HUMAN   | UBTF     | 2.5288 |
| 4 | 4  | Q9UNX3_RL26L_HUMAN  | RPL26L1  | 2.4165 |
| 4 | 4  | IGHG3_MOUSE         |          | 2.3987 |
| 4 | 4  | Q9BQG0_MBB1A_HUMAN  | MYBBP1A  | 2.3081 |
| 4 | 4  | P62280_RS11_HUMAN   | RPS11    | 1.8191 |
| 3 | 8  | HVM27_MOUSE         |          | 3.3586 |
| 3 | 6  | F8VXC8_F8VXC8_HUMAN | SMARCC2  | 3.1462 |
| 3 | 5  | P46779_RL28_HUMAN   | RPL28    | 1.9518 |
| 3 | 4  | P31943_HNRH1_HUMAN  | HNRNPH1  | 3.4635 |
| 3 | 4  | Q12905_ILF2_HUMAN   | ILF2     | 3.4294 |
| 3 | 4  | P62847_RS24_HUMAN   | RPS24    | 3.0842 |
| 3 | 4  | P62913_RL11_HUMAN   | RPL11    | 2.8795 |
| 3 | 4  | Q12906_ILF3_HUMAN   | ILF3     | 2.8626 |
| 3 | 4  | Q86UE4_LYRIC_HUMAN  | MTDH     | 2.5944 |
| 3 | 4  | Q6NVV1_R13P3_HUMAN  | RPL13AP3 | 2.2054 |
| 3 | 4  | P46776_RL27A_HUMAN  | RPL27A   | 2.0871 |
| 3 | 3  | Q13435_SF3B2_HUMAN  | SF3B2    | 3.5113 |
| 3 | 3  | Q9Y383_LC7L2_HUMAN  | LUC7L2   | 3.4097 |
| 3 | 3  | P30050_RL12_HUMAN   | RPL12    | 3.3471 |
| 3 | 3  | Q13151_ROA0_HUMAN   | HNRNPA0  | 3.2438 |
| 3 | 3  | P39019_RS19_HUMAN   | RPS19    | 3.2157 |
| 3 | 3  | P32969_RL9_HUMAN    | RPL9     | 3.1719 |
| 3 | 3  | O43390_HNRPR_HUMAN  | HNRNPR   | 3.1014 |
| 3 | 3  | P16403_H12_HUMAN    | HIST1H1C | 3.0787 |
| 3 | 3  | O95793_STAU1_HUMAN  | STAU1    | 3.052  |
| 3 | 3  | P16989_YBOX3_HUMAN  | YBX3     | 3.0122 |
| 3 | 3  | Q8NFW8_NEUA_HUMAN   | CMAS     | 2.9737 |
| 3 | 3  | P50914_RL14_HUMAN   | RPL14    | 2.9341 |
| 3 | 3  | P09651_ROA1_HUMAN   | HNRNPA1  | 2.9194 |
| 3 | 3  | P62906_RL10A_HUMAN  | RPL10A   | 2.8643 |
| 3 | 3  | P38159_RBMX_HUMAN   | RBMX     | 2.8517 |
| 3 | 3  | P07355_ANXA2_HUMAN  | ANXA2    | 2.8415 |
| 3 | 3  | O76021_RL1D1_HUMAN  | RSL1D1   | 2.7124 |
| 3 | 3  | O00505_IMA4_HUMAN   | KPNA3    | 2.5326 |
| 3 | 3  | O15523_DDX3Y_HUMAN  | DDX3Y    | 2.4701 |
| 3 | 3  | P62910_RL32_HUMAN   | RPL32    | 2.3351 |
| 3 | 3  | Q14684_RRP1B_HUMAN  | RRP1B    | 2.3345 |
| 3 | 3  | Q8N9T8_KRI1_HUMAN   | KRI1     | 2.1844 |
| 2 | 29 | P01605_KV113_HUMAN  |          | 2.2897 |
| 2 | 19 | P05067_A4_HUMAN     | APP      | 2.8712 |
| 2 | 16 | P62263_RS14_HUMAN   | RPS14    | 2.4346 |
| 2 | 9  | P05386_RLA1_HUMAN   | RPLP1    | 3.9504 |

|   |   |                    |          |        |
|---|---|--------------------|----------|--------|
| 2 | 8 | P84098_RL19_HUMAN  | RPL19    | 2.672  |
| 2 | 7 | KV2A7_MOUSE        |          | 2.8615 |
| 2 | 7 | P06312_KV401_HUMAN | IGKV4-1  | 2.6215 |
| 2 | 5 | Q9BYX7_ACTBM_HUMAN | POTEKP   | 3.2365 |
| 2 | 4 | Q86VM9_ZCH18_HUMAN | ZC3H18   | 3.0244 |
| 2 | 3 | P05388_RLA0_HUMAN  | RPLP0    | 3.7361 |
| 2 | 3 | O95602_RPA1_HUMAN  | POLR1A   | 3.3871 |
| 2 | 3 | O00629_IMA3_HUMAN  | KPNA4    | 3.2909 |
| 2 | 3 | P22087_FBRL_HUMAN  | FBL      | 3.2694 |
| 2 | 3 | P61513_RL37A_HUMAN | RPL37A   | 3.1902 |
| 2 | 3 | Q49A26_GLYR1_HUMAN | GLYR1    | 3.0821 |
| 2 | 3 | P27635_RL10_HUMAN  | RPL10    | 3.0543 |
| 2 | 3 | Q86YP4_P66A_HUMAN  | GATAD2A  | 2.8011 |
| 2 | 3 | Q5JNZ5_RS26L_HUMAN | RPS26P11 | 2.4885 |
| 2 | 3 | Q9Y3U8_RL36_HUMAN  | RPL36    | 2.1392 |
| 2 | 3 | Q9BU76_MMTA2_HUMAN | MMTAG2   | 2.12   |
| 2 | 3 | P62851_RS25_HUMAN  | RPS25    | 1.7435 |
| 2 | 2 | Q6UWP8_SBSN_HUMAN  | SBSN     | 4.3559 |
| 2 | 2 | Q14692_BMS1_HUMAN  | BMS1     | 4.0248 |
| 2 | 2 | Q86V81_THOC4_HUMAN | ALYREF   | 4.0079 |
| 2 | 2 | Q9Y2X3_NOP58_HUMAN | NOP58    | 3.9655 |
| 2 | 2 | Q14498_RBM39_HUMAN | RBM39    | 3.931  |
| 2 | 2 | P40938_RFC3_HUMAN  | RFC3     | 3.8101 |
| 2 | 2 | P16401_H15_HUMAN   | HIST1H1B | 3.4144 |
| 2 | 2 | Q02539_H11_HUMAN   | HIST1H1A | 3.3074 |
| 2 | 2 | P35637_FUS_HUMAN   | FUS      | 3.2743 |
| 2 | 2 | P47914_RL29_HUMAN  | RPL29    | 3.1194 |
| 2 | 2 | O75533_SF3B1_HUMAN | SF3B1    | 3.1017 |
| 2 | 2 | Q5JTH9_RRP12_HUMAN | RRP12    | 3.0428 |
| 2 | 2 | P35250_RFC2_HUMAN  | RFC2     | 2.9804 |
| 2 | 2 | P61978_HNRPK_HUMAN | HNRNPK   | 2.9687 |
| 2 | 2 | P0CW22_RS17L_HUMAN | RPS17L   | 2.8971 |
| 2 | 2 | Q9GZR7_DDX24_HUMAN | DDX24    | 2.8819 |
| 2 | 2 | P52294_IMA5_HUMAN  | KPNA1    | 2.8502 |
| 2 | 2 | Q1ED39_KNOP1_HUMAN | KNOP1    | 2.7687 |
| 2 | 2 | Q8TDD1_DDX54_HUMAN | DDX54    | 2.7645 |
| 2 | 2 | Q9NP64_NO40_HUMAN  | ZCCHC17  | 2.7279 |
| 2 | 2 | P54652_HSP72_HUMAN | HSPA2    | 2.6813 |
| 2 | 2 | P21333_FLNA_HUMAN  | FLNA     | 2.672  |
| 2 | 2 | P62987_RL40_HUMAN  | UBA52    | 2.6333 |
| 2 | 2 | P62081_RS7_HUMAN   | RPS7     | 2.5949 |
| 2 | 2 | O94776_MTA2_HUMAN  | MTA2     | 2.5937 |
| 2 | 2 | P62805_H4_HUMAN    | HIST1H4A | 2.5526 |
| 2 | 2 | O43143_DHX15_HUMAN | DHX15    | 2.5251 |
| 2 | 2 | Q96GQ7_DDX27_HUMAN | DDX27    | 2.49   |
| 2 | 2 | P62244_RS15A_HUMAN | RPS15A   | 2.4091 |
| 2 | 2 | Q9UIG0_BAZ1B_HUMAN | BAZ1B    | 2.4078 |

|   |    |                     |           |        |
|---|----|---------------------|-----------|--------|
| 2 | 2  | P62899_RL31_HUMAN   | RPL31     | 2.3805 |
| 2 | 2  | Q9UQ35_SRRM2_HUMAN  | SRRM2     | 2.3455 |
| 2 | 2  | Q13428_TCOF_HUMAN   | TCOF1     | 2.3375 |
| 2 | 2  | O15446_RPA34_HUMAN  | CD3EAP    | 2.2507 |
| 2 | 2  | Q969P6_TOP1M_HUMAN  | TOP1MT    | 2.0773 |
| 2 | 2  | Q02543_RL18A_HUMAN  | RPL18A    | 2.0679 |
| 2 | 2  | Q9GZS1_RPA49_HUMAN  | POLR1E    | 2.0165 |
| 2 | 2  | Q9NYF8_BCLF1_HUMAN  | BCLAF1    | 1.9936 |
| 2 | 2  | P62829_RL23_HUMAN   | RPL23     | 1.74   |
| 2 | 2  | P83881_RL36A_HUMAN  | RPL36A    | 1.6151 |
| 2 | 2  | Q9H6R4_NOL6_HUMAN   | NOL6      | 1.5202 |
| 2 | 2  | P68104_EEF1A1_HUMAN | EEF1A1    | 1.4697 |
| 1 | 12 | Q9C0D2_CEP295_HUMAN | CEP295    | 1.6329 |
| 1 | 3  | P46459_NSF_HUMAN    | NSF       | 2.0605 |
| 1 | 2  | O95232_LUC7L3_HUMAN | LUC7L3    | 4.7504 |
| 1 | 2  | P63173_RL38_HUMAN   | RPL38     | 3.5375 |
| 1 | 2  | P83731_RL24_HUMAN   | RPL24     | 2.5144 |
| 1 | 2  | SjGST_Schistosoma   |           | 2.1298 |
| 1 | 2  | Q9GZU3_TM39B_HUMAN  | TMEM39B   | 1.6444 |
| 1 | 2  | Q8TB03_CX038_HUMAN  | CXorf38   | 1.5089 |
| 1 | 1  | Q9HCY8_S10AE_HUMAN  | S100A14   | 4.8442 |
| 1 | 1  | C9J053_C9J053_HUMAN | PBRM1     | 4.5572 |
| 1 | 1  | P62995_TRA2B_HUMAN  | TRA2B     | 4.4574 |
| 1 | 1  | P05141_ADT2_HUMAN   | SLC25A5   | 4.1286 |
| 1 | 1  | P60866_RS20_HUMAN   | RPS20     | 3.8495 |
| 1 | 1  | Q9Y2R4_DDX52_HUMAN  | DDX52     | 3.7688 |
| 1 | 1  | Q9H7E9_CH033_HUMAN  | C8orf33   | 3.7686 |
| 1 | 1  | Q7Z2T5_TRM1L_HUMAN  | TRMT1L    | 3.7216 |
| 1 | 1  | G5E975_G5E975_HUMAN | SMARCB1   | 3.7005 |
| 1 | 1  | O96028_NSD2_HUMAN   | WHSC1     | 3.6673 |
| 1 | 1  | P62857_RS28_HUMAN   | RPS28     | 3.5628 |
| 1 | 1  | P04908_H2A1B_HUMAN  | HIST1H2AB | 3.5358 |
| 1 | 1  | Q9UKV3_ACINU_HUMAN  | ACIN1     | 3.4542 |
| 1 | 1  | O75223_GGCT_HUMAN   | GGCT      | 3.4491 |
| 1 | 1  | P63208_SKP1_HUMAN   | SKP1      | 3.3835 |
| 1 | 1  | O14786_NRP1_HUMAN   | NRP1      | 3.336  |
| 1 | 1  | P33778_H2B1B_HUMAN  | HIST1H2BB | 3.3221 |
| 1 | 1  | P49411_EFTU_HUMAN   | TUFM      | 3.322  |
| 1 | 1  | Q13823_NOG2_HUMAN   | GNL2      | 3.3198 |
| 1 | 1  | Q15517_CDSN_HUMAN   | CDSN      | 3.3051 |
| 1 | 1  | Q9H4L4_SENP3_HUMAN  | SENP3     | 3.292  |
| 1 | 1  | P34931_HS71L_HUMAN  | HSPA1L    | 3.2888 |
| 1 | 1  | O60506_HNRPQ_HUMAN  | SYNCRIP   | 3.2651 |
| 1 | 1  | P12273_PIP_HUMAN    | PIP       | 3.2564 |
| 1 | 1  | Q9H3D4_TP63_HUMAN   | TP63      | 3.2364 |
| 1 | 1  | Q9NQ39_RS10L_HUMAN  | RPS10P5   | 3.2156 |
| 1 | 1  | P62854_RS26_HUMAN   | RPS26     | 3.2151 |



|   |   |                     |           |        |
|---|---|---------------------|-----------|--------|
| 1 | 1 | P62888_RL30_HUMAN   | RPL30     | 3.1392 |
| 1 | 1 | Q6ZVX7_FBX50_HUMAN  | NCCRP1    | 3.1173 |
| 1 | 1 | Q07021_C1QBP_HUMAN  | C1QBP     | 3.1161 |
| 1 | 1 | Q13885_TBB2A_HUMAN  | TUBB2A    | 3.0862 |
| 1 | 1 | P56182_RRP1_HUMAN   | RRP1      | 2.9618 |
| 1 | 1 | Q96KR1_ZFR_HUMAN    | ZFR       | 2.9503 |
| 1 | 1 | P61956_SUMO2_HUMAN  | SUMO2     | 2.9451 |
| 1 | 1 | B7ZW38_HNRC3_HUMAN  | HNRNPCL3  | 2.8468 |
| 1 | 1 | P42766_RL35_HUMAN   | RPL35     | 2.8349 |
| 1 | 1 | P78527_PRKDC_HUMAN  | PRKDC     | 2.8326 |
| 1 | 1 | P07437_TBB5_HUMAN   | TUBB      | 2.8047 |
| 1 | 1 | O94906_PRPF6_HUMAN  | PRPF6     | 2.7103 |
| 1 | 1 | Q7Z478_DHX29_HUMAN  | DHX29     | 2.6858 |
| 1 | 1 | IgG1_bovine         |           | 2.673  |
| 1 | 1 | P78362_SRPK2_HUMAN  | SRPK2     | 2.6471 |
| 1 | 1 | P46783_RS10_HUMAN   | RPS10     | 2.6423 |
| 1 | 1 | P53007_TXTP_HUMAN   | SLC25A1   | 2.5907 |
| 1 | 1 | Q9NRL2_BAZ1A_HUMAN  | BAZ1A     | 2.5246 |
| 1 | 1 | P23458_JAK1_HUMAN   | JAK1      | 2.5221 |
| 1 | 1 | Q58FF7_H90B3_HUMAN  | HSP90AB3P | 2.5    |
| 1 | 1 | Q14444_CAPR1_HUMAN  | CAPRIN1   | 2.4985 |
| 1 | 1 | Q96L21_RL10L_HUMAN  | RPL10L    | 2.467  |
| 1 | 1 | P46821_MAP1B_HUMAN  | MAP1B     | 2.466  |
| 1 | 1 | Q08170_SRSF4_HUMAN  | SRSF4     | 2.4522 |
| 1 | 1 | F5H3T4_F5H3T4_HUMAN | SLC38A10  | 2.4521 |
| 1 | 1 | P62861_RS30_HUMAN   | FAU       | 2.3883 |
| 1 | 1 | P12235_ADT1_HUMAN   | SLC25A4   | 2.3848 |
| 1 | 1 | Q16695_H31T_HUMAN   | HIST3H3   | 2.3767 |
| 1 | 1 | Q15431_SYCP1_HUMAN  | SYCP1     | 2.3416 |
| 1 | 1 | Q96T37_RBM15_HUMAN  | RBM15     | 2.2946 |
| 1 | 1 | P35268_RL22_HUMAN   | RPL22     | 2.2816 |
| 1 | 1 | P55769_NH2L1_HUMAN  | NHP2L1    | 2.2511 |
| 1 | 1 | Q15365_PCBP1_HUMAN  | PCBP1     | 2.2449 |
| 1 | 1 | Q9BRJ6_CG050_HUMAN  | C7orf50   | 2.2328 |
| 1 | 1 | P10599_THIO_HUMAN   | TXN       | 2.1754 |
| 1 | 1 | P02649_APOE_HUMAN   | APOE      | 2.1676 |
| 1 | 1 | Q96PK6_RBM14_HUMAN  | RBM14     | 2.1096 |
| 1 | 1 | P35249_RFC4_HUMAN   | RFC4      | 2.0877 |
| 1 | 1 | Q9UPR3_SMG5_HUMAN   | SMG5      | 2.0652 |
| 1 | 1 | Q96QV6_H2A1A_HUMAN  | HIST1H2AA | 2.0324 |
| 1 | 1 | O75509_TNR21_HUMAN  | TNFRSF21  | 2.0157 |
| 1 | 1 | Q06830_PRDX1_HUMAN  | PRDX1     | 1.9801 |
| 1 | 1 | Q9BV38_WDR18_HUMAN  | WDR18     | 1.9773 |
| 1 | 1 | P02788_TRFL_HUMAN   | LTF       | 1.9569 |
| 1 | 1 | Q15233_NONO_HUMAN   | NONO      | 1.9515 |
| 1 | 1 | H0Y5B5_H0Y5B5_HUMAN | PBRM1     | 1.9238 |
| 1 | 1 | Q9NVI7_ATD3A_HUMAN  | ATAD3A    | 1.8753 |

|   |   |                     |         |        |
|---|---|---------------------|---------|--------|
| 1 | 1 | Q969Q0_RL36L_HUMAN  | RPL36AL | 1.8661 |
| 1 | 1 | Q13433_S39A6_HUMAN  | SLC39A6 | 1.8595 |
| 1 | 1 | O60293_ZC3H1_HUMAN  | ZFC3H1  | 1.8351 |
| 1 | 1 | P10809_CH60_HUMAN   | HSPD1   | 1.8168 |
| 1 | 1 | Q86V15_CASZ1_HUMAN  | CASZ1   | 1.7977 |
| 1 | 1 | P56537_IF6_HUMAN    | EIF6    | 1.7887 |
| 1 | 1 | Q9Y3C1_NOP16_HUMAN  | NOP16   | 1.7582 |
| 1 | 1 | P51589_CP2J2_HUMAN  | CYP2J2  | 1.7391 |
| 1 | 1 | Q9H307_PININ_HUMAN  | PNN     | 1.6524 |
| 1 | 1 | P12532_KCRU_HUMAN   | CKMT1A  | 1.6148 |
| 1 | 1 | Q9NT68_TEN2_HUMAN   | TENM2   | 1.6017 |
| 1 | 1 | F8WDE1_F8WDE1_HUMAN | IFNAR2  | 1.5519 |

**IP Mass Spec Proteins in A704-BAF180WT**

| Unique | Total | reference           | Gene Symbol | AVG    |
|--------|-------|---------------------|-------------|--------|
| 114    | 938   | Q86U86_PB1_HUMAN    | PBRM1       | 3.002  |
| 58     | 313   | Q8TAQ2_SMRC2_HUMAN  | SMARCC2     | 3.1503 |
| 55     | 279   | Q68CP9_ARID2_HUMAN  | ARID2       | 3.1938 |
| 54     | 231   | P51531_SMCA2_HUMAN  | SMARCA2     | 2.9201 |
| 43     | 146   | P51532_SMCA4_HUMAN  | SMARCA4     | 3.2281 |
| 35     | 144   | Q92922_SMRC1_HUMAN  | SMARCC1     | 3.1727 |
| 34     | 201   | Q9NPI1_BRD7_HUMAN   | BRD7        | 3.1539 |
| 33     | 116   | Q969G3_SMCE1_HUMAN  | SMARCE1     | 2.9025 |
| 26     | 102   | Q96GM5_SMRD1_HUMAN  | SMARCD1     | 2.9836 |
| 20     | 83    | Q8WUB8_PHF10_HUMAN  | PHF10       | 2.8649 |
| 20     | 61    | Q92925_SMRD2_HUMAN  | SMARCD2     | 2.9301 |
| 15     | 57    | O96019_ACL6A_HUMAN  | ACTL6A      | 2.8741 |
| 15     | 28    | P52292_IMA1_HUMAN   | KPNA2       | 2.9489 |
| 14     | 62    | Q4VC05_BCL7A_HUMAN  | BCL7A       | 3.1939 |
| 13     | 27    | Q12824_SNF5_HUMAN   | SMARCB1     | 2.7493 |
| 13     | 16    | P11021_GRP78_HUMAN  | HSPA5       | 3.4218 |
| 12     | 14    | P38646_GRP75_HUMAN  | HSPA9       | 3.2964 |
| 12     | 13    | P14735_IDE_HUMAN    | IDE         | 2.4613 |
| 12     | 12    | Q9NR30_DDX21_HUMAN  | DDX21       | 2.7774 |
| 11     | 16    | P11142_HSP7C_HUMAN  | HSPA8       | 3.1949 |
| 11     | 13    | P42357_HUTH_HUMAN   | HAL         | 2.971  |
| 10     | 15    | P23396_RS3_HUMAN    | RPS3        | 2.7027 |
| 9      | 122   | IGKC_MOUSE          |             | 2.9941 |
| 9      | 12    | Q71U36_TBA1A_HUMAN  | TUBA1A      | 2.6814 |
| 9      | 11    | P39060_COIA1_HUMAN  | COL18A1     | 2.8145 |
| 9      | 10    | P62701_RS4X_HUMAN   | RPS4X       | 2.8156 |
| 9      | 9     | Q9Y2W1_TR150_HUMAN  | THRAP3      | 2.9591 |
| 8      | 11    | Q00839_HNRPU_HUMAN  | HNRNPU      | 2.9005 |
| 8      | 9     | P15880_RS2_HUMAN    | RPS2        | 2.6092 |
| 8      | 9     | P46781_RS9_HUMAN    | RPS9        | 2.236  |
| 8      | 8     | P07355_ANXA2_HUMAN  | ANXA2       | 3.3655 |
| 7      | 34    | P62736_ACTA_HUMAN   | ACTA2       | 2.6465 |
| 7      | 9     | P06733_ENOA_HUMAN   | ENO1        | 3.521  |
| 7      | 8     | Q6UWP8_SBSN_HUMAN   | SBSN        | 3.2117 |
| 7      | 8     | Q13867_BLMH_HUMAN   | BLMH        | 3.0144 |
| 7      | 8     | Q06830_PRDX1_HUMAN  | PRDX1       | 2.1114 |
| 7      | 8     | P36578_RL4_HUMAN    | RPL4        | 2.0889 |
| 7      | 7     | P67809_YBOX1_HUMAN  | YBX1        | 3.7665 |
| 7      | 7     | Q02880_TOP2B_HUMAN  | TOP2B       | 3.3014 |
| 7      | 7     | Q07065_CKAP4_HUMAN  | CKAP4       | 3.1132 |
| 7      | 7     | Q08211_DHX9_HUMAN   | DHX9        | 2.6771 |
| 7      | 7     | P68104_EEF1A1_HUMAN | EEF1A1      | 2.5    |
| 7      | 7     | A8K2U0_A2ML1_HUMAN  | A2ML1       | 2.2427 |
| 6      | 13    | IGHM_MOUSE          | Igh-6       | 3.3293 |
| 6      | 7     | Q13127_REST_HUMAN   | REST        | 2.8103 |

|   |    |                    |          |        |
|---|----|--------------------|----------|--------|
| 6 | 6  | P02545_LMNA_HUMAN  | LMNA     | 3.1354 |
| 6 | 6  | P11388_TOP2A_HUMAN | TOP2A    | 2.8833 |
| 6 | 6  | P62269_RS18_HUMAN  | RPS18    | 2.5242 |
| 6 | 6  | P49411_EFTU_HUMAN  | TUFM     | 2.3847 |
| 6 | 6  | P62917_RL8_HUMAN   | RPL8     | 2.1468 |
| 5 | 26 | P60709_ACTB_HUMAN  | ACTB     | 3.5789 |
| 5 | 5  | P29401_TKT_HUMAN   | TKT      | 3.1324 |
| 5 | 5  | O75342_LX12B_HUMAN | ALOX12B  | 2.8947 |
| 5 | 5  | P54652_HSP72_HUMAN | HSPA2    | 2.816  |
| 5 | 5  | P01876_IGHA1_HUMAN | IGHA1    | 2.6704 |
| 5 | 5  | P62249_RS16_HUMAN  | RPS16    | 2.5621 |
| 5 | 5  | P32119_PRDX2_HUMAN | PRDX2    | 2.5319 |
| 5 | 5  | P61247_RS3A_HUMAN  | RPS3A    | 2.4999 |
| 5 | 5  | Q02878_RL6_HUMAN   | RPL6     | 2.1757 |
| 4 | 13 | IGH1M_MOUSE        | Ighg1    | 2.8568 |
| 4 | 8  | P04280_PRP1_HUMAN  | PRB1     | 3.3901 |
| 4 | 6  | P39023_RL3_HUMAN   | RPL3     | 2.3455 |
| 4 | 5  | P04792_HSPB1_HUMAN | HSPB1    | 3.5519 |
| 4 | 5  | P05387_RLA2_HUMAN  | RPLP2    | 3.5184 |
| 4 | 5  | P04406_G3P_HUMAN   | GAPDH    | 3.3208 |
| 4 | 5  | P06748_NPM_HUMAN   | NPM1     | 2.5526 |
| 4 | 5  | IGHG3_MOUSE        |          | 2.4964 |
| 4 | 4  | Q13885_TBB2A_HUMAN | TUBB2A   | 4.1573 |
| 4 | 4  | P62241_RS8_HUMAN   | RPS8     | 3.2269 |
| 4 | 4  | P12273_PIP_HUMAN   | PIP      | 3.0537 |
| 4 | 4  | Q8WVV4_POF1B_HUMAN | POF1B    | 2.9473 |
| 4 | 4  | P62805_H4_HUMAN    | HIST1H4A | 2.932  |
| 4 | 4  | Q6ZVX7_FBX50_HUMAN | NCCRP1   | 2.8894 |
| 4 | 4  | P02788_TRFL_HUMAN  | LTF      | 2.7881 |
| 4 | 4  | Q96DA0_ZG16B_HUMAN | ZG16B    | 2.7797 |
| 4 | 4  | O15523_DDX3Y_HUMAN | DDX3Y    | 2.6204 |
| 4 | 4  | P62753_RS6_HUMAN   | RPS6     | 2.5639 |
| 4 | 4  | P25311_ZA2G_HUMAN  | AZGP1    | 2.5457 |
| 4 | 4  | P26373_RL13_HUMAN  | RPL13    | 2.4908 |
| 4 | 4  | P18124_RL7_HUMAN   | RPL7     | 1.9952 |
| 3 | 11 | Q8WUZ0_BCL7C_HUMAN | BCL7C    | 4.0083 |
| 3 | 6  | P84098_RL19_HUMAN  | RPL19    | 3.4902 |
| 3 | 5  | P60174_TPIS_HUMAN  | TPI1     | 2.613  |
| 3 | 4  | P35579_MYH9_HUMAN  | MYH9     | 3.2792 |
| 3 | 4  | P30838_AL3A1_HUMAN | ALDH3A1  | 2.9645 |
| 3 | 4  | Q86VM9_ZCH18_HUMAN | ZC3H18   | 2.7445 |
| 3 | 4  | P10599_THIO_HUMAN  | TXN      | 2.3319 |
| 3 | 3  | P09211_GSTP1_HUMAN | GSTP1    | 4.1415 |
| 3 | 3  | P52294_IMA5_HUMAN  | KPNA1    | 4.0822 |
| 3 | 3  | P16989_YBOX3_HUMAN | YBX3     | 4.0344 |
| 3 | 3  | Q8NFW8_NEUA_HUMAN  | CMAS     | 3.5635 |
| 3 | 3  | P21333_FLNA_HUMAN  | FLNA     | 3.4127 |

|   |    |                     |           |        |
|---|----|---------------------|-----------|--------|
| 3 | 3  | Q9HCY8_S10AE_HUMAN  | S100A14   | 3.2753 |
| 3 | 3  | P30050_RL12_HUMAN   | RPL12     | 3.2739 |
| 3 | 3  | Q9UH99_SUN2_HUMAN   | SUN2      | 3.1274 |
| 3 | 3  | P16403_H12_HUMAN    | HIST1H1C  | 3.0986 |
| 3 | 3  | P62987_RL40_HUMAN   | UBA52     | 2.9578 |
| 3 | 3  | P38159_RBMX_HUMAN   | RBMX      | 2.9159 |
| 3 | 3  | Q9UQ35_SRRM2_HUMAN  | SRRM2     | 2.8869 |
| 3 | 3  | Q07021_C1QBP_HUMAN  | C1QBP     | 2.8433 |
| 3 | 3  | P05141_ADT2_HUMAN   | SLC25A5   | 2.8192 |
| 3 | 3  | P78527_PRKDC_HUMAN  | PRKDC     | 2.7877 |
| 3 | 3  | Q09666_AHMK_HUMAN   | AHNAK     | 2.7318 |
| 3 | 3  | Q8IYB3_SRRM1_HUMAN  | SRRM1     | 2.7248 |
| 3 | 3  | P22626_ROA2_HUMAN   | HNRNPA2B1 | 2.6328 |
| 3 | 3  | Q49A26_GLYR1_HUMAN  | GLYR1     | 2.5724 |
| 3 | 3  | P19338_NUCL_HUMAN   | NCL       | 2.4572 |
| 3 | 3  | Q00577_PURA_HUMAN   | PURA      | 2.3218 |
| 3 | 3  | P62851_RS25_HUMAN   | RPS25     | 2.2987 |
| 3 | 3  | Q00325_MPCP_HUMAN   | SLC25A3   | 2.2482 |
| 3 | 3  | Q13428_TCOF_HUMAN   | TCOF1     | 2.2197 |
| 3 | 3  | P01024_CO3_HUMAN    | C3        | 2.1243 |
| 3 | 3  | Q96HS1_PGAM5_HUMAN  | PGAM5     | 2.0701 |
| 2 | 51 | P01605_KV113_HUMAN  |           | 2.3698 |
| 2 | 17 | F8VXC8_F8VXC8_HUMAN | SMARCC2   | 3.655  |
| 2 | 13 | P06312_KV401_HUMAN  | IGKV4-1   | 2.5383 |
| 2 | 9  | P46459_NSF_HUMAN    | NSF       | 1.7771 |
| 2 | 7  | P02814_SMR3B_HUMAN  | SMR3B     | 2.8483 |
| 2 | 6  | Q9BYX7_ACTBM_HUMAN  | POTEKP    | 2.9206 |
| 2 | 3  | P01834_IGKC_HUMAN   | IGKC      | 4.5678 |
| 2 | 3  | Q53RT3_APRV1_HUMAN  | ASPRV1    | 2.9612 |
| 2 | 3  | P60866_RS20_HUMAN   | RPS20     | 2.8555 |
| 2 | 3  | KV2A7_MOUSE         |           | 2.7996 |
| 2 | 2  | Q86V81_THOC4_HUMAN  | ALYREF    | 4.6914 |
| 2 | 2  | P31943_HNRH1_HUMAN  | HNRNPH1   | 4.4337 |
| 2 | 2  | P05386_RLA1_HUMAN   | RPLP1     | 4.0595 |
| 2 | 2  | Q9BQ50_TREX2_HUMAN  | TREX2     | 3.7998 |
| 2 | 2  | P62424_RL7A_HUMAN   | RPL7A     | 3.7699 |
| 2 | 2  | P62913_RL11_HUMAN   | RPL11     | 3.6791 |
| 2 | 2  | Q07020_RL18_HUMAN   | RPL18     | 3.5748 |
| 2 | 2  | P04040_CATA_HUMAN   | CAT       | 3.5722 |
| 2 | 2  | P07900_HS90A_HUMAN  | HSP90AA1  | 3.4237 |
| 2 | 2  | O75223_GGCT_HUMAN   | GGCT      | 3.4021 |
| 2 | 2  | Q9UBG3_CRNN_HUMAN   | CRNN      | 3.3538 |
| 2 | 2  | Q02539_H11_HUMAN    | HIST1H1A  | 3.3401 |
| 2 | 2  | P30086_PEBP1_HUMAN  | PEBP1     | 3.319  |
| 2 | 2  | P62244_RS15A_HUMAN  | RPS15A    | 3.3168 |
| 2 | 2  | P12814_ACTN1_HUMAN  | ACTN1     | 3.2889 |
| 2 | 2  | P62847_RS24_HUMAN   | RPS24     | 3.2493 |

|   |    |                     |           |        |
|---|----|---------------------|-----------|--------|
| 2 | 2  | Q9HC78_ZBT20_HUMAN  | ZBTB20    | 3.2317 |
| 2 | 2  | P52597_HNRPF_HUMAN  | HNRNPF    | 3.2309 |
| 2 | 2  | P23246_SFPQ_HUMAN   | SFPQ      | 3.1382 |
| 2 | 2  | P61978_HNRPK_HUMAN  | HNRNPK    | 3.1322 |
| 2 | 2  | B9A064_IGLL5_HUMAN  | IGLL5     | 3.1154 |
| 2 | 2  | P27635_RL10_HUMAN   | RPL10     | 2.9959 |
| 2 | 2  | P62266_RS23_HUMAN   | RPS23     | 2.9894 |
| 2 | 2  | P13639_EEF2_HUMAN   | EEF2      | 2.9697 |
| 2 | 2  | Q9BQE9_BCL7B_HUMAN  | BCL7B     | 2.9434 |
| 2 | 2  | Q6NZI2_PTRF_HUMAN   | Ptrf      | 2.8703 |
| 2 | 2  | P61626_LYSC_HUMAN   | LYZ       | 2.8482 |
| 2 | 2  | P51991_ROA3_HUMAN   | HNRNPA3   | 2.8473 |
| 2 | 2  | Q96EY7_PTC3_HUMAN   | PTCD3     | 2.8218 |
| 2 | 2  | O43240_KLK10_HUMAN  | KLK10     | 2.7772 |
| 2 | 2  | Q9BRK5_CAB45_HUMAN  | SDF4      | 2.7534 |
| 2 | 2  | P00338_LDHA_HUMAN   | LDHA      | 2.7478 |
| 2 | 2  | P12235_ADT1_HUMAN   | SLC25A4   | 2.7214 |
| 2 | 2  | P62263_RS14_HUMAN   | RPS14     | 2.6869 |
| 2 | 2  | P19784_CSK22_HUMAN  | CSNK2A2   | 2.6705 |
| 2 | 2  | P46776_RL27A_HUMAN  | RPL27A    | 2.6692 |
| 2 | 2  | P01857_IGHG1_HUMAN  | IGHG1     | 2.6322 |
| 2 | 2  | O60506_HNRPQ_HUMAN  | SYNCRIP   | 2.5473 |
| 2 | 2  | P07437_TBB5_HUMAN   | TUBB      | 2.5309 |
| 2 | 2  | Q96FQ6_S10AG_HUMAN  | S100A16   | 2.4674 |
| 2 | 2  | Q9P0G3_KLK14_HUMAN  | KLK14     | 2.1224 |
| 2 | 2  | Q9HC84_MUC5B_HUMAN  | MUC5B     | 2.072  |
| 2 | 2  | P61353_RL27_HUMAN   | RPL27     | 2.0108 |
| 2 | 2  | P62280_RS11_HUMAN   | RPS11     | 1.8923 |
| 2 | 2  | P25398_RS12_HUMAN   | RPS12     | 1.8809 |
| 2 | 2  | P07910_HNRPC_HUMAN  | HNRNPC    | 1.8188 |
| 2 | 2  | Q13510_ASAH1_HUMAN  | ASAH1     | 1.8182 |
| 2 | 2  | Q5SSJ5_HP1B3_HUMAN  | HP1BP3    | 1.7405 |
| 1 | 10 | Q9C0D2_CEP295_HUMAN | CEP295    | 1.6485 |
| 1 | 6  | HVM27_MOUSE         |           | 3.9098 |
| 1 | 3  | Q9NX55_HYPK_HUMAN   | HYPK      | 1.9039 |
| 1 | 2  | P04908_H2A1B_HUMAN  | HIST1H2AB | 3.1615 |
| 1 | 2  | G5E975_G5E975_HUMAN | SMARCB1   | 2.9415 |
| 1 | 2  | Q15517_CDSN_HUMAN   | CDSN      | 2.7199 |
| 1 | 2  | Q58FF7_H90B3_HUMAN  | HSP90AB3P | 2.6456 |
| 1 | 2  | P15515_HIS1_HUMAN   | HTN1      | 2.5564 |
| 1 | 2  | Q13573_SNW1_HUMAN   | SNW1      | 1.6607 |
| 1 | 2  | P23435_CBLN1_HUMAN  | CBLN1     | 1.6124 |
| 1 | 1  | P05388_RLA0_HUMAN   | RPLP0     | 5.1123 |
| 1 | 1  | P35251_RFC1_HUMAN   | RFC1      | 4.9426 |
| 1 | 1  | Q9Y383_LC7L2_HUMAN  | LUC7L2    | 4.6674 |
| 1 | 1  | C9J053_C9J053_HUMAN | PBRM1     | 4.6129 |
| 1 | 1  | O95232_LC7L3_HUMAN  | LUC7L3    | 4.5736 |

|   |   |                     |          |        |
|---|---|---------------------|----------|--------|
| 1 | 1 | P18510_IL1RA_HUMAN  | IL1RN    | 4.5576 |
| 1 | 1 | Ig1_sheep           |          | 4.5242 |
| 1 | 1 | P01766_HV305_HUMAN  |          | 4.4503 |
| 1 | 1 | P62995_TRA2B_HUMAN  | TRA2B    | 4.4003 |
| 1 | 1 | Q8WWA1_TMM40_HUMAN  | TMEM40   | 4.3974 |
| 1 | 1 | P56537_IF6_HUMAN    | EIF6     | 4.3106 |
| 1 | 1 | P69905_HBA_HUMAN    | HBA1     | 4.21   |
| 1 | 1 | C9J9L6_C9J9L6_HUMAN | PBRM1    | 4.0305 |
| 1 | 1 | P12236_ADT3_HUMAN   | SLC25A6  | 4.0119 |
| 1 | 1 | Q9NUQ6_SPS2L_HUMAN  | SPATS2L  | 3.9526 |
| 1 | 1 | P52907_CAZA1_HUMAN  | CAPZA1   | 3.897  |
| 1 | 1 | P02647_APOA1_HUMAN  | APOA1    | 3.8528 |
| 1 | 1 | P62854_RS26_HUMAN   | RPS26    | 3.8406 |
| 1 | 1 | Q9UGM3_DMBT1_HUMAN  | DMBT1    | 3.8341 |
| 1 | 1 | P63173_RL38_HUMAN   | RPL38    | 3.8245 |
| 1 | 1 | Q9Y6N5_SQRD_HUMAN   | SQRDL    | 3.8242 |
| 1 | 1 | Q9UIG0_BAZ1B_HUMAN  | BAZ1B    | 3.7595 |
| 1 | 1 | P08107_HSP71_HUMAN  | HSPA1A   | 3.6183 |
| 1 | 1 | Q9HC07_TM165_HUMAN  | TMEM165  | 3.543  |
| 1 | 1 | O43390_HNRPR_HUMAN  | HNRNPR   | 3.4413 |
| 1 | 1 | P55072_TERA_HUMAN   | VCP      | 3.4082 |
| 1 | 1 | Q16610_ECM1_HUMAN   | ECM1     | 3.316  |
| 1 | 1 | Q8N9T8_KRI1_HUMAN   | KRI1     | 3.3158 |
| 1 | 1 | P61513_RL37A_HUMAN  | RPL37A   | 3.3021 |
| 1 | 1 | Q9UJ70_NAGK_HUMAN   | NAGK     | 3.2997 |
| 1 | 1 | P01871_IGHM_HUMAN   | IGHM     | 3.2779 |
| 1 | 1 | Q9NVP1_DDX18_HUMAN  | DDX18    | 3.2671 |
| 1 | 1 | P34931_HS71L_HUMAN  | HSPA1L   | 3.2168 |
| 1 | 1 | P10809_CH60_HUMAN   | HSPD1    | 3.2026 |
| 1 | 1 | P35250_RFC2_HUMAN   | RFC2     | 3.1519 |
| 1 | 1 | Q12906_ILF3_HUMAN   | ILF3     | 3.1406 |
| 1 | 1 | P68366_TBA4A_HUMAN  | TUBA4A   | 3.0899 |
| 1 | 1 | P62906_RL10A_HUMAN  | RPL10A   | 3.0859 |
| 1 | 1 | P62857_RS28_HUMAN   | RPS28    | 3.0854 |
| 1 | 1 | POCW22_RS17L_HUMAN  | RPS17L   | 3.0246 |
| 1 | 1 | Q12905_ILF2_HUMAN   | ILF2     | 2.987  |
| 1 | 1 | Q9HCM4_E41L5_HUMAN  | EPB41L5  | 2.9549 |
| 1 | 1 | P39019_RS19_HUMAN   | RPS19    | 2.952  |
| 1 | 1 | Q7Z478_DHX29_HUMAN  | DHX29    | 2.9293 |
| 1 | 1 | Q5JNZ5_RS26L_HUMAN  | RPS26P11 | 2.927  |
| 1 | 1 | P46783_RS10_HUMAN   | RPS10    | 2.918  |
| 1 | 1 | Q9BQG0_MBB1A_HUMAN  | MYBBP1A  | 2.8773 |
| 1 | 1 | P11166_GTR1_HUMAN   | SLC2A1   | 2.856  |
| 1 | 1 | P23280_CAH6_HUMAN   | CA6      | 2.8169 |
| 1 | 1 | P28074_PSB5_HUMAN   | PSMB5    | 2.8097 |
| 1 | 1 | P68871_HBB_HUMAN    | HBB      | 2.7957 |
| 1 | 1 | P60900_PSA6_HUMAN   | PSMA6    | 2.7903 |

|   |   |                    |           |        |
|---|---|--------------------|-----------|--------|
| 1 | 1 | P00441_SODC_HUMAN  | SOD1      | 2.7778 |
| 1 | 1 | Q9H3D4_P63_HUMAN   | TP63      | 2.7654 |
| 1 | 1 | P61956_SUMO2_HUMAN | SUMO2     | 2.7598 |
| 1 | 1 | Q9Y2X3_NOP58_HUMAN | NOP58     | 2.7441 |
| 1 | 1 | IgG1_bovine        |           | 2.7088 |
| 1 | 1 | Q12873_CHD3_HUMAN  | CHD3      | 2.7087 |
| 1 | 1 | Q6NVV1_R13P3_HUMAN | RPL13AP3  | 2.6958 |
| 1 | 1 | Q92665_RT31_HUMAN  | MRPS31    | 2.6876 |
| 1 | 1 | P53007_TXTP_HUMAN  | SLC25A1   | 2.6448 |
| 1 | 1 | P62861_RS30_HUMAN  | FAU       | 2.6    |
| 1 | 1 | Q96G03_PGM2_HUMAN  | PGM2      | 2.5407 |
| 1 | 1 | O60832_DKC1_HUMAN  | DKC1      | 2.4914 |
| 1 | 1 | P01591_IGJ_HUMAN   | IGJ       | 2.4899 |
| 1 | 1 | Q15365_PCBP1_HUMAN | PCBP1     | 2.4804 |
| 1 | 1 | P62750_RL23A_HUMAN | RPL23A    | 2.4711 |
| 1 | 1 | P49207_RL34_HUMAN  | RPL34     | 2.4602 |
| 1 | 1 | Q15293_RCN1_HUMAN  | RCN1      | 2.404  |
| 1 | 1 | O00629_IMA3_HUMAN  | KPNA4     | 2.401  |
| 1 | 1 | Q9NY12_GAR1_HUMAN  | GAR1      | 2.3907 |
| 1 | 1 | P11279_LAMP1_HUMAN | LAMP1     | 2.3598 |
| 1 | 1 | Q6P4A8_PLBL1_HUMAN | PLBD1     | 2.3114 |
| 1 | 1 | Q9NQ39_RS10L_HUMAN | RPS10P5   | 2.311  |
| 1 | 1 | P31949_S10AB_HUMAN | S100A11   | 2.3058 |
| 1 | 1 | Q9NP55_BPIA1_HUMAN | BPIFA1    | 2.3051 |
| 1 | 1 | P58107_EPIPL_HUMAN | EPPK1     | 2.2795 |
| 1 | 1 | P27482_CALL3_HUMAN | CALML3    | 2.2624 |
| 1 | 1 | P20339_RAB5A_HUMAN | RAB5A     | 2.2611 |
| 1 | 1 | O60684_IMA7_HUMAN  | KPNA6     | 2.2588 |
| 1 | 1 | O00505_IMA4_HUMAN  | KPNA3     | 2.2561 |
| 1 | 1 | A0FGR8_ESYT2_HUMAN | ESYT2     | 2.2232 |
| 1 | 1 | Q9NS86_LANC2_HUMAN | LANCL2    | 2.2211 |
| 1 | 1 | Q4FZB7_SV421_HUMAN | SUV420H1  | 2.2011 |
| 1 | 1 | P18077_RL35A_HUMAN | RPL35A    | 2.1966 |
| 1 | 1 | Q8TDL5_BPIB1_HUMAN | BPIFB1    | 2.1708 |
| 1 | 1 | Q96QV6_H2A1A_HUMAN | HIST1H2AA | 2.1674 |
| 1 | 1 | P09038_FGF2_HUMAN  | FGF2      | 2.1614 |
| 1 | 1 | Q15828_CYTM_HUMAN  | CST6      | 2.1497 |
| 1 | 1 | P10323_ACRO_HUMAN  | ACR       | 2.1368 |
| 1 | 1 | Q02543_RL18A_HUMAN | RPL18A    | 2.1074 |
| 1 | 1 | P45880_VDAC2_HUMAN | VDAC2     | 2.0231 |
| 1 | 1 | P35249_RFC4_HUMAN  | RFC4      | 2.0196 |
| 1 | 1 | P62826_RAN_HUMAN   | RAN       | 1.9512 |
| 1 | 1 | P25789_PSA4_HUMAN  | PSMA4     | 1.9413 |
| 1 | 1 | P62829_RL23_HUMAN  | RPL23     | 1.9269 |
| 1 | 1 | Q96L21_RL10L_HUMAN | RPL10L    | 1.9215 |
| 1 | 1 | P10643_CO7_HUMAN   | C7        | 1.9164 |
| 1 | 1 | Q9UPN3_MACF1_HUMAN | MACF1     | 1.8563 |



|   |   |                     |          |        |
|---|---|---------------------|----------|--------|
| 1 | 1 | O00567_NOP56_HUMAN  | NOP56    | 1.8477 |
| 1 | 1 | Q8WWY3_PRPF31_HUMAN | PRPF31   | 1.826  |
| 1 | 1 | O95402_MED26_HUMAN  | MED26    | 1.809  |
| 1 | 1 | Q8WZ42_TITIN_HUMAN  | TTN      | 1.7461 |
| 1 | 1 | P50454_SERPH_HUMAN  | SERPINH1 | 1.7399 |
| 1 | 1 | O14556_G3PT_HUMAN   | GAPDHS   | 1.6895 |
| 1 | 1 | P01023_A2MG_HUMAN   | A2M      | 1.6805 |
| 1 | 1 | Q3KQU3_MA7D1_HUMAN  | MAP7D1   | 1.6229 |
| 1 | 1 | P83881_RL36A_HUMAN  | RPL36A   | 1.5981 |
| 1 | 1 | Q9UI42_CBPA4_HUMAN  | CPA4     | 1.5802 |
| 1 | 1 | P23588_IF4B_HUMAN   | EIF4B    | 1.575  |
| 1 | 1 | Q9NRD8_DUOX2_HUMAN  | DUOX2    | 1.546  |
| 1 | 1 | F8WCA4_F8WCA4_HUMAN | KLC4     | 1.5005 |

**IP Mass Spec Proteins A704-BAF180Q1298\***

| Unique | Total | reference          | Gene Symbol | AVG    |
|--------|-------|--------------------|-------------|--------|
| 99     | 1042  | Q86U86_PB1_HUMAN   | PBRM1       | 2.9729 |
| 13     | 17    | Q9Y2W1_TR150_HUMAN | THRAP3      | 2.8972 |
| 8      | 12    | P52292_IMA1_HUMAN  | KPNA2       | 3.4165 |
| 7      | 7     | P01876_IGHA1_HUMAN | IGHA1       | 2.5164 |
| 6      | 6     | Q8TAQ2_SMRC2_HUMAN | SMARCC2     | 3.5866 |
| 6      | 6     | P51532_SMCA4_HUMAN | SMARCA4     | 3.2815 |
| 6      | 6     | P62701_RS4X_HUMAN  | RPS4X       | 2.832  |
| 6      | 6     | P19338_NUCL_HUMAN  | NCL         | 2.6391 |
| 6      | 6     | Q02878_RL6_HUMAN   | RPL6        | 2.2105 |
| 5      | 7     | P23396_RS3_HUMAN   | RPS3        | 2.6145 |
| 5      | 6     | P36578_RL4_HUMAN   | RPL4        | 2.4664 |
| 5      | 6     | P38646_GRP75_HUMAN | HSPA9       | 2.454  |
| 5      | 6     | P39060_COIA1_HUMAN | COL18A1     | 2.4456 |
| 5      | 6     | P46781_RS9_HUMAN   | RPS9        | 2.1682 |
| 5      | 5     | Q07065_CKAP4_HUMAN | CKAP4       | 3.1687 |
| 5      | 5     | P07355_ANXA2_HUMAN | ANXA2       | 3.1385 |
| 5      | 5     | P11021_GRP78_HUMAN | HSPA5       | 3.039  |
| 5      | 5     | P11388_TOP2A_HUMAN | TOP2A       | 2.7557 |
| 5      | 5     | Q06830_PRDX1_HUMAN | PRDX1       | 2.139  |
| 4      | 6     | P62736_ACTA_HUMAN  | ACTA2       | 2.1609 |
| 4      | 5     | P62241_RS8_HUMAN   | RPS8        | 3.1699 |
| 4      | 4     | Q71U36_TBA1A_HUMAN | TUBA1A      | 3.383  |
| 4      | 4     | P51531_SMCA2_HUMAN | SMARCA2     | 2.7549 |
| 4      | 4     | Q13127_REST_HUMAN  | REST        | 2.4654 |
| 4      | 4     | P10599_THIO_HUMAN  | TXN         | 2.3697 |
| 4      | 4     | P61247_RS3A_HUMAN  | RPS3A       | 2.0085 |
| 3      | 5     | P67809_YBOX1_HUMAN | YBX1        | 3.564  |
| 3      | 5     | IGH1M_MOUSE        | Ighg1       | 2.9087 |
| 3      | 4     | P05387_RLA2_HUMAN  | RPLP2       | 4.1584 |
| 3      | 4     | P60709_ACTB_HUMAN  | ACTB        | 2.9888 |
| 3      | 3     | Q00839_HNRPU_HUMAN | HNRNPU      | 3.6047 |
| 3      | 3     | Q02880_TOP2B_HUMAN | TOP2B       | 3.3567 |
| 3      | 3     | Q13885_TBB2A_HUMAN | TUBB2A      | 3.2027 |
| 3      | 3     | P11142_HSP7C_HUMAN | HSPA8       | 3.1345 |
| 3      | 3     | P62987_RL40_HUMAN  | UBA52       | 3.1056 |
| 3      | 3     | Q8IYB3_SRRM1_HUMAN | SRRM1       | 3.0899 |
| 3      | 3     | P68104_EF1A1_HUMAN | EEF1A1      | 2.9476 |
| 3      | 3     | Q8NFW8_NEUA_HUMAN  | CMAS        | 2.7513 |
| 3      | 3     | P62805_H4_HUMAN    | HIST1H4A    | 2.6471 |
| 3      | 3     | P16403_H12_HUMAN   | HIST1H1C    | 2.6153 |
| 3      | 3     | Q8WUB8_PHF10_HUMAN | PHF10       | 2.5444 |
| 3      | 3     | P22626_ROA2_HUMAN  | HNRNPA2B1   | 2.4298 |
| 3      | 3     | P15880_RS2_HUMAN   | RPS2        | 2.3963 |
| 3      | 3     | P39023_RL3_HUMAN   | RPL3        | 2.3254 |
| 2      | 34    | IGKC_MOUSE         |             | 2.9853 |

|   |   |                     |           |        |
|---|---|---------------------|-----------|--------|
| 2 | 3 | P05386_RLA1_HUMAN   | RPLP1     | 3.9106 |
| 2 | 3 | Q9NPI1_BRD7_HUMAN   | BRD7      | 3.346  |
| 2 | 3 | O14786_NRP1_HUMAN   | NRP1      | 3.0854 |
| 2 | 3 | P06748_NPM_HUMAN    | NPM1      | 2.9906 |
| 2 | 3 | Q96HS1_PGAM5_HUMAN  | PGAM5     | 2.8347 |
| 2 | 3 | P06733_ENOA_HUMAN   | ENO1      | 2.6059 |
| 2 | 3 | SjGST_Schistosoma   |           | 2.224  |
| 2 | 2 | Q9NYF8_BCLF1_HUMAN  | BCLAF1    | 4.1768 |
| 2 | 2 | P84098_RL19_HUMAN   | RPL19     | 3.8286 |
| 2 | 2 | IGHM_MOUSE          | Igh-6     | 3.7405 |
| 2 | 2 | P04406_G3P_HUMAN    | GAPDH     | 3.4099 |
| 2 | 2 | Q9Y383_LC7L2_HUMAN  | LUC7L2    | 3.3286 |
| 2 | 2 | P62424_RL7A_HUMAN   | RPL7A     | 3.0881 |
| 2 | 2 | P62266_RS23_HUMAN   | RPS23     | 3.079  |
| 2 | 2 | P60866_RS20_HUMAN   | RPS20     | 2.7606 |
| 2 | 2 | P18124_RL7_HUMAN    | RPL7      | 2.7582 |
| 2 | 2 | P23246_SFPQ_HUMAN   | SFPQ      | 2.6521 |
| 2 | 2 | P62847_RS24_HUMAN   | RPS24     | 2.6351 |
| 2 | 2 | P62249_RS16_HUMAN   | RPS16     | 2.6215 |
| 2 | 2 | Q9UQ35_SRRM2_HUMAN  | SRRM2     | 2.5888 |
| 2 | 2 | P30050_RL12_HUMAN   | RPL12     | 2.5856 |
| 2 | 2 | Q09666_AHNK_HUMAN   | AHNAK     | 2.5636 |
| 2 | 2 | P61978_HNRPK_HUMAN  | HNRNPCK   | 2.5497 |
| 2 | 2 | P62899_RL31_HUMAN   | RPL31     | 2.5265 |
| 2 | 2 | P62913_RL11_HUMAN   | RPL11     | 2.5153 |
| 2 | 2 | P50454_SERPH_HUMAN  | SERPINH1  | 2.4506 |
| 2 | 2 | P62917_RL8_HUMAN    | RPL8      | 2.4363 |
| 2 | 2 | P62269_RS18_HUMAN   | RPS18     | 2.336  |
| 2 | 2 | P12235_ADT1_HUMAN   | SLC25A4   | 2.1915 |
| 2 | 2 | P21333_FLNA_HUMAN   | FLNA      | 2.1645 |
| 2 | 2 | O15523_DDX3Y_HUMAN  | DDX3Y     | 2.1584 |
| 2 | 2 | Q68CP9_ARID2_HUMAN  | ARID2     | 2.124  |
| 2 | 2 | P62807_H2B1C_HUMAN  | HIST1H2BC | 2.0373 |
| 2 | 2 | P62753_RS6_HUMAN    | RPS6      | 1.9912 |
| 2 | 2 | Q16695_H31T_HUMAN   | HIST3H3   | 1.988  |
| 2 | 2 | P62277_RS13_HUMAN   | RPS13     | 1.8614 |
| 2 | 2 | P18077_RL35A_HUMAN  | RPL35A    | 1.8451 |
| 2 | 2 | Q8NHW5_RLAOL_HUMAN  | RPLP0P6   | 1.6679 |
| 1 | 3 | Q15517_CDSN_HUMAN   | CDSN      | 2.923  |
| 1 | 3 | P06312_KV401_HUMAN  | IGKV4-1   | 2.3488 |
| 1 | 2 | Q6UWP8_SBSN_HUMAN   | SBSN      | 4.2839 |
| 1 | 2 | C9J9L6_C9J9L6_HUMAN | PBRM1     | 3.9229 |
| 1 | 2 | Q13428_TCOF_HUMAN   | TCOF1     | 3.4206 |
| 1 | 2 | Q8WWY3_PRPF31_HUMAN | PRPF31    | 2.1078 |
| 1 | 1 | P16989_YBOX3_HUMAN  | YBX3      | 5.2926 |
| 1 | 1 | C9J053_C9J053_HUMAN | PBRM1     | 4.5582 |
| 1 | 1 | P62244_RS15A_HUMAN  | RPS15A    | 4.4839 |

|   |   |                    |           |        |
|---|---|--------------------|-----------|--------|
| 1 | 1 | P51991_ROA3_HUMAN  | HNRNPA3   | 4.4457 |
| 1 | 1 | Q969G3_SMCE1_HUMAN | SMARCE1   | 4.2794 |
| 1 | 1 | P31943_HNRH1_HUMAN | HNRNPH1   | 4.0928 |
| 1 | 1 | P62995_TRA2B_HUMAN | TRA2B     | 3.8904 |
| 1 | 1 | P63173_RL38_HUMAN  | RPL38     | 3.8371 |
| 1 | 1 | P47914_RL29_HUMAN  | RPL29     | 3.82   |
| 1 | 1 | Q9H3D4_P63_HUMAN   | TP63      | 3.7412 |
| 1 | 1 | O75223_GGCT_HUMAN  | GGCT      | 3.6906 |
| 1 | 1 | Q9NR30_DDX21_HUMAN | DDX21     | 3.6743 |
| 1 | 1 | KV2A7_MOUSE        |           | 3.6711 |
| 1 | 1 | P84103_SRSF3_HUMAN | SRSF3     | 3.5306 |
| 1 | 1 | Q96GM5_SMRD1_HUMAN | SMARCD1   | 3.4259 |
| 1 | 1 | Q49A26_GLYR1_HUMAN | GLYR1     | 3.4218 |
| 1 | 1 | P26373_RL13_HUMAN  | RPL13     | 3.3437 |
| 1 | 1 | P39019_RS19_HUMAN  | RPS19     | 3.3313 |
| 1 | 1 | P01834_IGKC_HUMAN  | IGKC      | 3.2874 |
| 1 | 1 | B9A064_IGLL5_HUMAN | IGLL5     | 3.2297 |
| 1 | 1 | Q16610_ECM1_HUMAN  | ECM1      | 3.1057 |
| 1 | 1 | Q86VM9_ZCH18_HUMAN | ZC3H18    | 3.0476 |
| 1 | 1 | Q02539_H11_HUMAN   | HIST1H1A  | 2.9988 |
| 1 | 1 | P62263_RS14_HUMAN  | RPS14     | 2.9956 |
| 1 | 1 | P68871_HBB_HUMAN   | HBB       | 2.9203 |
| 1 | 1 | P49411_EFTU_HUMAN  | TUFM      | 2.9056 |
| 1 | 1 | Q9UGM3_DMBT1_HUMAN | DMBT1     | 2.882  |
| 1 | 1 | P38159_RBMX_HUMAN  | RBMX      | 2.8125 |
| 1 | 1 | P34931_HS71L_HUMAN | HSPA1L    | 2.7962 |
| 1 | 1 | Q9BRK5_CAB45_HUMAN | SDF4      | 2.7824 |
| 1 | 1 | Q16629_SRSF7_HUMAN | SRSF7     | 2.7036 |
| 1 | 1 | Q6NVV1_R13P3_HUMAN | RPL13AP3  | 2.6938 |
| 1 | 1 | Q9BUJ2_HNRL1_HUMAN | HNRNPUL1  | 2.6667 |
| 1 | 1 | Q5JNZ5_RS26L_HUMAN | RPS26P11  | 2.63   |
| 1 | 1 | Q12873_CHD3_HUMAN  | CHD3      | 2.6253 |
| 1 | 1 | Q9UNX3_RL26L_HUMAN | RPL26L1   | 2.5585 |
| 1 | 1 | Q14669_TRIPC_HUMAN | TRIP12    | 2.5463 |
| 1 | 1 | P62861_RS30_HUMAN  | FAU       | 2.5453 |
| 1 | 1 | Q9NVP1_DDX18_HUMAN | DDX18     | 2.5412 |
| 1 | 1 | P27816_MAP4_HUMAN  | MAP4      | 2.5059 |
| 1 | 1 | P04908_H2A1B_HUMAN | HIST1H2AB | 2.4913 |
| 1 | 1 | IgG1_bovine        |           | 2.4897 |
| 1 | 1 | P46776_RL27A_HUMAN | RPL27A    | 2.4707 |
| 1 | 1 | P33778_H2B1B_HUMAN | HIST1H2BB | 2.4598 |
| 1 | 1 | P18462_1A25_HUMAN  | HLA-A     | 2.4539 |
| 1 | 1 | P25705_ATPA_HUMAN  | ATP5A1    | 2.4181 |
| 1 | 1 | Q12824_SNF5_HUMAN  | SMARCB1   | 2.3934 |
| 1 | 1 | P34741_SDC2_HUMAN  | SDC2      | 2.38   |
| 1 | 1 | P46779_RL28_HUMAN  | RPL28     | 2.3627 |
| 1 | 1 | Q7Z478_DHX29_HUMAN | DHX29     | 2.3226 |

|   |   |                     |           |        |
|---|---|---------------------|-----------|--------|
| 1 | 1 | F8WAF8_F8WAF8_HUMAN | ZNF140    | 2.2549 |
| 1 | 1 | P01591_IGJ_HUMAN    | IGJ       | 2.2382 |
| 1 | 1 | Q96A08_H2B1A_HUMAN  | HIST1H2BA | 2.1926 |
| 1 | 1 | Q13867_BLMH_HUMAN   | BLMH      | 2.1497 |
| 1 | 1 | P83731_RL24_HUMAN   | RPL24     | 2.1043 |
| 1 | 1 | P04083_ANXA1_HUMAN  | ANXA1     | 2.0597 |
| 1 | 1 | P42166_LAP2A_HUMAN  | TMPO      | 2.0452 |
| 1 | 1 | P11387_TOP1_HUMAN   | TOP1      | 2.0421 |
| 1 | 1 | Q8N9T8_KRI1_HUMAN   | KRI1      | 2.0396 |
| 1 | 1 | Q9HAZ2_PRDM16_HUMAN | PRDM16    | 2.0266 |
| 1 | 1 | Q92922_SMRC1_HUMAN  | SMARCC1   | 2.0221 |
| 1 | 1 | O75342_LX12B_HUMAN  | ALOX12B   | 2.0145 |
| 1 | 1 | Q6UB35_C1TM_HUMAN   | MTHFD1L   | 1.9464 |
| 1 | 1 | Q5T750_XP32_HUMAN   | XP32      | 1.9364 |
| 1 | 1 | Q6ZR08_DYH12_HUMAN  | DNAH12    | 1.9005 |
| 1 | 1 | Q99848_EBP2_HUMAN   | EBNA1BP2  | 1.8687 |
| 1 | 1 | Q13576_IQGA2_HUMAN  | IQGAP2    | 1.8548 |
| 1 | 1 | P61353_RL27_HUMAN   | RPL27     | 1.8505 |
| 1 | 1 | P07910_HNRPC_HUMAN  | HNRNPC    | 1.8132 |
| 1 | 1 | Q6ZVX7_FBX50_HUMAN  | NCCRP1    | 1.7839 |
| 1 | 1 | P15090_FABP4_HUMAN  | FABP4     | 1.7451 |
| 1 | 1 | P05141_ADT2_HUMAN   | SLC25A5   | 1.7353 |
| 1 | 1 | Q08211_DHX9_HUMAN   | DHX9      | 1.6497 |
| 1 | 1 | Q8N9T2_CX042_HUMAN  | NKAPP1    | 1.6068 |
| 1 | 1 | J3QKQ5_J3QKQ5_HUMAN | KPNB1     | 1.6049 |
| 1 | 1 | P23435_CBLN1_HUMAN  | CBLN1     | 1.5782 |
| 1 | 1 | P20936_RASA1_HUMAN  | RASA1     | 1.5638 |

**IP Mass Spec Proteins in A704-EV**

| Unique | Total | reference          | Gene Symbol | AVG    |
|--------|-------|--------------------|-------------|--------|
| 13     | 13    | Q6UWP8_SBSN_HUMAN  | SBSN        | 2.6916 |
| 10     | 13    | P07355_ANXA2_HUMAN | ANXA2       | 3.2264 |
| 8      | 99    | IGKC_MOUSE         |             | 2.9804 |
| 8      | 10    | P32119_PRDX2_HUMAN | PRDX2       | 2.4571 |
| 8      | 9     | P04040_CATA_HUMAN  | CAT         | 3.5058 |
| 8      | 8     | P42357_HUTH_HUMAN  | HAL         | 2.4756 |
| 7      | 12    | P04406_G3P_HUMAN   | GAPDH       | 3.3877 |
| 5      | 11    | IGH1M_MOUSE        | Ighg1       | 2.8707 |
| 5      | 9     | IGHM_MOUSE         | Igh-6       | 3.0703 |
| 5      | 6     | Q15517_CDSN_HUMAN  | CDSN        | 3.114  |
| 5      | 6     | P11021_GRP78_HUMAN | HSPA5       | 3.1097 |
| 5      | 6     | P14618_KPYM_HUMAN  | PKM         | 2.9457 |
| 5      | 5     | P58107_EPIPL_HUMAN | EPPK1       | 3.5169 |
| 5      | 5     | P00491_PNP_HUMAN   | PNP         | 2.7839 |
| 5      | 5     | Q13867_BLMH_HUMAN  | BLMH        | 2.682  |
| 5      | 5     | Q06830_PRDX1_HUMAN | PRDX1       | 2.0912 |
| 4      | 5     | P06733_ENOA_HUMAN  | ENO1        | 3.2822 |
| 4      | 5     | P60709_ACTB_HUMAN  | ACTB        | 2.6573 |
| 4      | 4     | Q6ZVX7_FBX50_HUMAN | NCCRP1      | 2.7473 |
| 4      | 4     | P25311_ZA2G_HUMAN  | AZGP1       | 2.1972 |
| 3      | 4     | P04792_HSPB1_HUMAN | HSPB1       | 3.7547 |
| 3      | 4     | IGHG3_MOUSE        |             | 2.5006 |
| 3      | 3     | Q8WVV4_POF1B_HUMAN | POF1B       | 3.4149 |
| 3      | 3     | P29401_TKT_HUMAN   | TKT         | 3.4118 |
| 3      | 3     | P49189_AL9A1_HUMAN | ALDH9A1     | 3.3805 |
| 3      | 3     | O75223_GGCT_HUMAN  | GGCT        | 2.8089 |
| 3      | 3     | P28074_PSB5_HUMAN  | PSMB5       | 2.7691 |
| 3      | 3     | Q16610_ECM1_HUMAN  | ECM1        | 2.504  |
| 3      | 3     | P07900_HS90A_HUMAN | HSP90AA1    | 2.3078 |
| 3      | 3     | Q8IW75_SPA12_HUMAN | SERPINA12   | 2.0838 |
| 2      | 36    | P01605_KV113_HUMAN |             | 2.3031 |
| 2      | 11    | P06312_KV401_HUMAN | IGKV4-1     | 2.424  |
| 2      | 4     | HVM27_MOUSE        |             | 4.0637 |
| 2      | 2     | P62736_ACTA_HUMAN  | ACTA2       | 3.8117 |
| 2      | 2     | P62987_RL40_HUMAN  | UBA52       | 3.4239 |
| 2      | 2     | P06396_GELS_HUMAN  | GSN         | 3.4012 |
| 2      | 2     | Q8TAA3_PSA7L_HUMAN | PSMA8       | 3.2329 |
| 2      | 2     | P30086_PEBP1_HUMAN | PEBP1       | 3.1103 |
| 2      | 2     | P50395_GDIB_HUMAN  | GDI2        | 2.8586 |
| 2      | 2     | P18206_VINC_HUMAN  | VCL         | 2.6098 |
| 2      | 2     | P35606_COPB2_HUMAN | COPB2       | 2.5594 |
| 2      | 2     | Q01469_FABP5_HUMAN | FABP5       | 2.3925 |
| 2      | 2     | P10599_THIO_HUMAN  | TXN         | 2.2415 |
| 2      | 2     | P12081_SYHC_HUMAN  | HARS        | 1.9821 |
| 2      | 2     | Q6E0U4_DMKN_HUMAN  | DMKN        | 1.9511 |

|   |   |                    |           |        |
|---|---|--------------------|-----------|--------|
| 2 | 2 | Q15149_PLEC_HUMAN  | PLEC      | 1.9349 |
| 1 | 3 | P04280_PRP1_HUMAN  | PRB1      | 3.3567 |
| 1 | 2 | O60303_K0556_HUMAN | KIAA0556  | 1.7346 |
| 1 | 2 | O14556_G3PT_HUMAN  | GAPDHS    | 1.5681 |
| 1 | 2 | Q14149_MORC3_HUMAN | MORC3     | 1.5587 |
| 1 | 1 | O14786_NRP1_HUMAN  | NRP1      | 5.0292 |
| 1 | 1 | P49721_PSB2_HUMAN  | PSMB2     | 4.2161 |
| 1 | 1 | Q9HCY8_S10AE_HUMAN | S100A14   | 4.2003 |
| 1 | 1 | O95865_DDAH2_HUMAN | DDAH2     | 4.1597 |
| 1 | 1 | Q9UJ70_NAGK_HUMAN  | NAGK      | 3.8591 |
| 1 | 1 | P25786_PSA1_HUMAN  | PSMA1     | 3.6051 |
| 1 | 1 | P35579_MYH9_HUMAN  | MYH9      | 3.5501 |
| 1 | 1 | KV2A7_MOUSE        |           | 3.4544 |
| 1 | 1 | P53634_CATC_HUMAN  | CTSC      | 3.3835 |
| 1 | 1 | P49720_PSB3_HUMAN  | PSMB3     | 3.3203 |
| 1 | 1 | P25787_PSA2_HUMAN  | PSMA2     | 3.2832 |
| 1 | 1 | P35030_TRY3_HUMAN  | PRSS3     | 3.2588 |
| 1 | 1 | P47756_CAPZB_HUMAN | CAPZB     | 3.1515 |
| 1 | 1 | P60900_PSA6_HUMAN  | PSMA6     | 3.1501 |
| 1 | 1 | Q9H3D4_P63_HUMAN   | TP63      | 2.8942 |
| 1 | 1 | Q9BVK6_TMED9_HUMAN | TMED9     | 2.8237 |
| 1 | 1 | Q9BZG9_LYNX1_HUMAN | LYNX1     | 2.8174 |
| 1 | 1 | P27482_CALL3_HUMAN | CALML3    | 2.7771 |
| 1 | 1 | P12273_PIP_HUMAN   | PIP       | 2.7529 |
| 1 | 1 | P02545_LMNA_HUMAN  | LMNA      | 2.7521 |
| 1 | 1 | P34931_HS71L_HUMAN | HSPA1L    | 2.7275 |
| 1 | 1 | P54652_HSP72_HUMAN | HSPA2     | 2.7214 |
| 1 | 1 | P11279_LAMP1_HUMAN | LAMP1     | 2.7212 |
| 1 | 1 | Q6XQN6_PNCB_HUMAN  | NAPRT     | 2.6954 |
| 1 | 1 | P30740_ILEU_HUMAN  | SERPINB1  | 2.6498 |
| 1 | 1 | P55786_PSA_HUMAN   | NPEPPS    | 2.6314 |
| 1 | 1 | Q12873_CHD3_HUMAN  | CHD3      | 2.6312 |
| 1 | 1 | Q96DR8_MUCL1_HUMAN | MUCL1     | 2.5991 |
| 1 | 1 | P01024_CO3_HUMAN   | C3        | 2.577  |
| 1 | 1 | P04083_ANXA1_HUMAN | ANXA1     | 2.5197 |
| 1 | 1 | P13639_EF2_HUMAN   | EEF2      | 2.4787 |
| 1 | 1 | P01876_IGHA1_HUMAN | IGHA1     | 2.4774 |
| 1 | 1 | Q96G03_PGM2_HUMAN  | PGM2      | 2.3648 |
| 1 | 1 | Q3ZCW2_LEGL_HUMAN  | LGALSL    | 2.3254 |
| 1 | 1 | Q92665_RT31_HUMAN  | MRPS31    | 2.266  |
| 1 | 1 | Q9NZH8_IL36G_HUMAN | IL36G     | 2.2618 |
| 1 | 1 | P35237_SPB6_HUMAN  | SERPINB6  | 2.2569 |
| 1 | 1 | Q7Z478_DHX29_HUMAN | DHX29     | 2.2255 |
| 1 | 1 | Q58FF7_H90B3_HUMAN | HSP90AB3P | 2.1973 |
| 1 | 1 | O95969_SG1D2_HUMAN | SCGB1D2   | 2.1883 |
| 1 | 1 | P06753_TPM3_HUMAN  | TPM3      | 2.1281 |
| 1 | 1 | Q15828_CYTM_HUMAN  | CST6      | 2.1188 |

|   |   |                     |         |        |
|---|---|---------------------|---------|--------|
| 1 | 1 | P20618_PSB1_HUMAN   | PSMB1   | 2.0593 |
| 1 | 1 | A6NCQ8_A6NCQ8_HUMAN | FCER1G  | 2.0023 |
| 1 | 1 | P25789_PSA4_HUMAN   | PSMA4   | 1.9396 |
| 1 | 1 | Q53RT3_APRV1_HUMAN  | ASPRV1  | 1.9331 |
| 1 | 1 | Q7Z6R9_AP2D_HUMAN   | TFAP2D  | 1.9216 |
| 1 | 1 | B9A064_IGLL5_HUMAN  | IGLL5   | 1.8643 |
| 1 | 1 | O95140_MFN2_HUMAN   | MFN2    | 1.8383 |
| 1 | 1 | Q8N9T2_CX042_HUMAN  | NKAPP1  | 1.6922 |
| 1 | 1 | Q9Y6L6_SO1B1_HUMAN  | SLCO1B1 | 1.6807 |
| 1 | 1 | P01023_A2MG_HUMAN   | A2M     | 1.6465 |
| 1 | 1 | P23435_CBLN1_HUMAN  | CBLN1   | 1.6266 |
| 1 | 1 | Q5QJ74_TBCEL_HUMAN  | TBCEL   | 1.5361 |



Table S2. Genes Regulated by BAF180/BRG1 Complex but not BAF180/BRM Complex.

**Genes Downregulated by BAF180/BRG1, but not BAF180/BRM---214 genes**

| Ensemble ID     | symbol  | entrezgene |
|-----------------|---------|------------|
| ENSG00000006210 | CX3CL1  | 6376       |
| ENSG00000024422 | EHD2    | 30846      |
| ENSG00000029153 | ARNTL2  | 56938      |
| ENSG00000039560 | RAI14   | 26064      |
| ENSG00000052126 | PLEKHA5 | 54477      |
| ENSG00000052802 | MSMO1   | 6307       |
| ENSG00000061918 | GUCY1B3 | 2983       |
| ENSG00000068697 | LAPTM4A | 9741       |
| ENSG00000072274 | TFRC    | 7037       |
| ENSG00000074410 | CA12    | 771        |
| ENSG00000075218 | GTSE1   | 51512      |
| ENSG00000075234 | TTC38   | 55020      |
| ENSG00000075275 | CELSR1  | 9620       |
| ENSG00000075618 | FSCN1   | 6624       |
| ENSG00000082438 | COBLL1  | 22837      |
| ENSG00000082684 | SEMA5B  | 54437      |
| ENSG00000082898 | XPO1    | 7514       |
| ENSG00000085662 | AKR1B1  | 231        |
| ENSG00000088812 | ATRN    | 8455       |
| ENSG00000088832 | FKBP1A  | 2280       |
| ENSG00000088930 | XRN2    | 22803      |
| ENSG00000089006 | SNX5    | 27131      |
| ENSG00000089063 | TMEM230 | 29058      |
| ENSG00000090006 | LTBP4   | 8425       |
| ENSG00000090530 | P3H2    | 55214      |
| ENSG00000092621 | PHGDH   | 26227      |
| ENSG00000093000 | NUP50   | 10762      |
| ENSG00000095637 | SORBS1  | 10580      |
| ENSG00000099194 | SCD     | 6319       |
| ENSG00000099942 | CRKL    | 1399       |
| ENSG00000099999 | RNF215  | 200312     |
| ENSG00000100028 | SNRPD3  | 6634       |
| ENSG00000100030 | MAPK1   | 5594       |
| ENSG00000100060 | MFNG    | 4242       |
| ENSG00000100065 | CARD10  | 29775      |
| ENSG00000100097 | LGALS1  | 3956       |
| ENSG00000100201 | DDX17   | 10521      |
| ENSG00000100241 | SBF1    | 6305       |
| ENSG00000100263 | RHBDD3  | 25807      |

|                 |         |        |
|-----------------|---------|--------|
| ENSG00000100297 | MCM5    | 4174   |
| ENSG00000100320 | RBFOX2  | 23543  |
| ENSG00000100330 | MTMR3   | 8897   |
| ENSG00000100342 | APOL1   | 8542   |
| ENSG00000100345 | MYH9    | 4627   |
| ENSG00000100403 | ZC3H7B  | 23264  |
| ENSG00000101003 | GIN51   | 9837   |
| ENSG00000101224 | CDC25B  | 994    |
| ENSG00000101266 | CSNK2A1 | 1457   |
| ENSG00000101290 | CDS2    | 8760   |
| ENSG00000101384 | JAG1    | 182    |
| ENSG00000101474 | APMAP   | 57136  |
| ENSG00000102038 | SMARCA1 | 6594   |
| ENSG00000102678 | FGF9    | 2254   |
| ENSG00000105048 | TNNT1   | 7138   |
| ENSG00000105825 | TFPI2   | 7980   |
| ENSG00000105854 | PON2    | 5445   |
| ENSG00000105875 | WDR91   | 29062  |
| ENSG00000106080 | FKBP14  | 55033  |
| ENSG00000106415 | GLCCI1  | 113263 |
| ENSG00000106483 | SFRP4   | 6424   |
| ENSG00000107798 | LIPA    | 3988   |
| ENSG00000108821 | COL1A1  | 1277   |
| ENSG00000109814 | UGDH    | 7358   |
| ENSG00000109846 | CRYAB   | 1410   |
| ENSG00000111799 | COL12A1 | 1303   |
| ENSG00000112902 | SEMA5A  | 9037   |
| ENSG00000112972 | HMGCS1  | 3157   |
| ENSG00000113389 | NPR3    | 4883   |
| ENSG00000113924 | HGD     | 3081   |
| ENSG00000115419 | GLS     | 2744   |
| ENSG00000115884 | SDC1    | 6382   |
| ENSG00000116016 | EPAS1   | 2034   |
| ENSG00000116133 | DHCR24  | 1718   |
| ENSG00000116962 | NID1    | 4811   |
| ENSG00000117020 | AKT3    | 10000  |
| ENSG00000117114 | ADGRL2  | 23266  |
| ENSG00000117298 | ECE1    | 1889   |
| ENSG00000118515 | SGK1    | 6446   |
| ENSG00000118762 | PKD2    | 5311   |
| ENSG00000118971 | CCND2   | 894    |
| ENSG00000119969 | HELLS   | 3070   |
| ENSG00000121039 | RDH10   | 157506 |

|                 |          |        |
|-----------------|----------|--------|
| ENSG00000121858 | TNFSF10  | 8743   |
| ENSG00000122591 | FAM126A  | 84668  |
| ENSG00000123384 | LRP1     | 4035   |
| ENSG00000124564 | SLC17A3  | 10786  |
| ENSG00000124766 | SOX4     | 6659   |
| ENSG00000125398 | SOX9     | 6662   |
| ENSG00000125726 | CD70     | 970    |
| ENSG00000125730 | C3       | 718    |
| ENSG00000125826 | RBCK1    | 10616  |
| ENSG00000125848 | FLRT3    | 23767  |
| ENSG00000125864 | BFSP1    | 631    |
| ENSG00000125868 | DSTN     | 11034  |
| ENSG00000125871 | MGME1    | 92667  |
| ENSG00000125875 | TBC1D20  | 128637 |
| ENSG00000125885 | MCM8     | 84515  |
| ENSG00000125968 | ID1      | 3397   |
| ENSG00000127863 | TNFRSF19 | 55504  |
| ENSG00000127920 | GNG11    | 2791   |
| ENSG00000127990 | SGCE     | 8910   |
| ENSG00000128245 | YWHAH    | 7533   |
| ENSG00000128274 | A4GALT   | 53947  |
| ENSG00000128342 | LIF      | 3976   |
| ENSG00000130638 | ATXN10   | 25814  |
| ENSG00000132646 | PCNA     | 5111   |
| ENSG00000132669 | RIN2     | 54453  |
| ENSG00000133401 | PDZD2    | 23037  |
| ENSG00000133466 | C1QTNF6  | 114904 |
| ENSG00000134215 | VAV3     | 10451  |
| ENSG00000135457 | TFCP2    | 7024   |
| ENSG00000135862 | LAMC1    | 3915   |
| ENSG00000136156 | ITM2B    | 9445   |
| ENSG00000136244 | IL6      | 3569   |
| ENSG00000136295 | TTYH3    | 80727  |
| ENSG00000136378 | ADAMTS7  | 11173  |
| ENSG00000137273 | FOXF2    | 2295   |
| ENSG00000137478 | FCHSD2   | 9873   |
| ENSG00000138942 | RNF185   | 91445  |
| ENSG00000142102 | ATHL1    | 80162  |
| ENSG00000143742 | SRP9     | 6726   |
| ENSG00000144354 | CDCA7    | 83879  |
| ENSG00000145555 | MYO10    | 4651   |
| ENSG00000145604 | SKP2     | 6502   |
| ENSG00000148672 | GLUD1    | 2746   |

|                 |         |        |
|-----------------|---------|--------|
| ENSG00000152527 | PLEKHH2 | 130271 |
| ENSG00000152578 | GRIA4   | 2893   |
| ENSG00000153707 | PTPRD   | 5789   |
| ENSG00000153902 | LGI4    | 163175 |
| ENSG00000154269 | ENPP3   | 5169   |
| ENSG00000155629 | PIK3AP1 | 118788 |
| ENSG00000156113 | KCNMA1  | 3778   |
| ENSG00000157514 | TSC22D3 | 1831   |
| ENSG00000157851 | DPYSL5  | 56896  |
| ENSG00000159403 | C1R     | 715    |
| ENSG00000160285 | LSS     | 4047   |
| ENSG00000162496 | DHRS3   | 9249   |
| ENSG00000162745 | OLFML2B | 25903  |
| ENSG00000162878 | PKDCC   | 91461  |
| ENSG00000163347 | CLDN1   | 9076   |
| ENSG00000163739 | CXCL1   | 2919   |
| ENSG00000164211 | STARD4  | 134429 |
| ENSG00000164237 | CMBL    | 134147 |
| ENSG00000164366 | CCDC127 | 133957 |
| ENSG00000164830 | OXR1    | 55074  |
| ENSG00000165092 | ALDH1A1 | 216    |
| ENSG00000165685 | TMEM52B | 120939 |
| ENSG00000166681 | NGFRAP1 | 27018  |
| ENSG00000166897 | ELFN2   | 114794 |
| ENSG00000167191 | GPRC5B  | 51704  |
| ENSG00000167693 | NXN     | 64359  |
| ENSG00000167772 | ANGPTL4 | 51129  |
| ENSG00000167996 | FTH1    | 2495   |
| ENSG00000168077 | SCARA3  | 51435  |
| ENSG00000168385 | 2-Sep   | 4735   |
| ENSG00000168672 | FAM84B  | 157638 |
| ENSG00000169435 | RASSF6  | 166824 |
| ENSG00000169439 | SDC2    | 6383   |
| ENSG00000169604 | ANTXR1  | 84168  |
| ENSG00000170915 | PAQR8   | 85315  |
| ENSG00000171631 | P2RY6   | 5031   |
| ENSG00000171867 | PRNP    | 5621   |
| ENSG00000172264 | MACROD2 | 140733 |
| ENSG00000172380 | GNG12   | 55970  |
| ENSG00000172893 | DHCR7   | 1717   |
| ENSG00000173391 | OLR1    | 4973   |
| ENSG00000177508 | IRX3    | 79191  |
| ENSG00000178234 | GALNT11 | 63917  |

|                 |              |           |
|-----------------|--------------|-----------|
| ENSG00000178803 | ADORA2A-AS   | 646023    |
| ENSG00000179456 | ZBTB18       | 10472     |
| ENSG00000179750 | APOBEC3B     | 9582      |
| ENSG00000181019 | NQO1         | 1728      |
| ENSG00000182272 | B4GALNT4     | 338707    |
| ENSG00000182326 | C1S          | 716       |
| ENSG00000182667 | NTM          | 50863     |
| ENSG00000182944 | EWSR1        | 2130      |
| ENSG00000183049 | CAMK1D       | 57118     |
| ENSG00000183421 | RIPK4        | 54101     |
| ENSG00000183696 | UPP1         | 7378      |
| ENSG00000183741 | CBX6         | 23466     |
| ENSG00000184117 | NIPSNAP1     | 8508      |
| ENSG00000184164 | CRELD2       | 79174     |
| ENSG00000185033 | SEMA4B       | 10509     |
| ENSG00000185340 | GAS2L1       | 10634     |
| ENSG00000185386 | MAPK11       | 5600      |
| ENSG00000185499 | MUC1         | 4582      |
| ENSG00000185630 | PBX1         | 5087      |
| ENSG00000185651 | UBE2L3       | 7332      |
| ENSG00000185950 | IRS2         | 8660      |
| ENSG00000186575 | NF2          | 4771      |
| ENSG00000186897 | C1QL4        | 338761    |
| ENSG00000187244 | BCAM         | 4059      |
| ENSG00000188064 | WNT7B        | 7477      |
| ENSG00000188130 | MAPK12       | 6300      |
| ENSG00000188153 | COL4A5       | 1287      |
| ENSG00000188636 | LDOC1L       | 84247     |
| ENSG00000196411 | EPHB4        | 2050      |
| ENSG00000196562 | SULF2        | 55959     |
| ENSG00000196576 | PLXNB2       | 23654     |
| ENSG00000197696 | NMB          | 4828      |
| ENSG00000198053 | SIRPA        | 140885    |
| ENSG00000198792 | TMEM184B     | 25829     |
| ENSG00000198911 | SREBF2       | 6721      |
| ENSG00000198959 | TGM2         | 7052      |
| ENSG00000215193 | PEX26        | 55670     |
| ENSG00000221890 | NPTXR        | 23467     |
| ENSG00000225431 | LOC101928233 | 101928233 |
| ENSG00000237517 | DGCR5        | 26220     |
| ENSG00000240694 | PNMA2        | 10687     |
| ENSG00000241878 | PISD         | 23761     |
| ENSG00000242265 | PEG10        | 23089     |

|                 |          |           |
|-----------------|----------|-----------|
| ENSG00000243156 | MICAL3   | 57553     |
| ENSG00000244509 | APOBEC3C | 27350     |
| ENSG00000261115 | TMEM178B | 100507421 |

**Genes Upregulated by BAF180/BRG1, but not BAF180/BRM---136 genes**

| Ensemble ID     | symbol   | entrezgene |
|-----------------|----------|------------|
| ENSG00000004961 | HCCS     | 3052       |
| ENSG00000039123 | SKIV2L2  | 23517      |
| ENSG00000040275 | SPDL1    | 54908      |
| ENSG00000044446 | PHKA2    | 5256       |
| ENSG00000044524 | EPHA3    | 2042       |
| ENSG00000064042 | LIMCH1   | 22998      |
| ENSG00000064763 | FAR2     | 55711      |
| ENSG00000067167 | TRAM1    | 23471      |
| ENSG00000069869 | NEDD4    | 4734       |
| ENSG00000075340 | ADD2     | 119        |
| ENSG00000079819 | EPB41L2  | 2037       |
| ENSG00000081923 | ATP8B1   | 5205       |
| ENSG00000086712 | TXLNG    | 55787      |
| ENSG00000089486 | CDIP1    | 29965      |
| ENSG00000091490 | SEL1L3   | 23231      |
| ENSG00000092841 | MYL6     | 4637       |
| ENSG00000101849 | TBL1X    | 6907       |
| ENSG00000102054 | RBBP7    | 5931       |
| ENSG00000102172 | SMS      | 6611       |
| ENSG00000106105 | GARS     | 2617       |
| ENSG00000106688 | SLC1A1   | 6505       |
| ENSG00000110048 | OSBP     | 5007       |
| ENSG00000112499 | SLC22A2  | 6582       |
| ENSG00000112983 | BRD8     | 10902      |
| ENSG00000112984 | KIF20A   | 10112      |
| ENSG00000113013 | HSPA9    | 3313       |
| ENSG00000113141 | IK       | 3550       |
| ENSG00000113163 | COL4A3BP | 10087      |
| ENSG00000113282 | CLINT1   | 9685       |
| ENSG00000113312 | TTC1     | 7265       |
| ENSG00000113369 | ARRDC3   | 57561      |
| ENSG00000113441 | LNPEP    | 4012       |
| ENSG00000113575 | PPP2CA   | 5515       |
| ENSG00000113580 | NR3C1    | 2908       |
| ENSG00000118620 | ZNF430   | 80264      |
| ENSG00000118640 | VAMP8    | 8673       |
| ENSG00000120314 | WDR55    | 54853      |
| ENSG00000120549 | KIAA1217 | 56243      |
| ENSG00000120725 | SIL1     | 64374      |
| ENSG00000121281 | ADCY7    | 113        |
| ENSG00000127022 | CANX     | 821        |

|                 |          |        |
|-----------------|----------|--------|
| ENSG00000129625 | REEP5    | 7905   |
| ENSG00000129680 | MAP7D3   | 79649  |
| ENSG00000129824 | RPS4Y1   | 6192   |
| ENSG00000130021 | PUDP     | 8226   |
| ENSG00000130234 | ACE2     | 59272  |
| ENSG00000131507 | NDFIP1   | 80762  |
| ENSG00000132561 | MATN2    | 4147   |
| ENSG00000134138 | MEIS2    | 4212   |
| ENSG00000134352 | IL6ST    | 3572   |
| ENSG00000134480 | CCNH     | 902    |
| ENSG00000134516 | DOCK2    | 1794   |
| ENSG00000135318 | NT5E     | 4907   |
| ENSG00000138675 | FGF5     | 2250   |
| ENSG00000140416 | TPM1     | 7168   |
| ENSG00000140937 | CDH11    | 1009   |
| ENSG00000141562 | NARF     | 26502  |
| ENSG00000143367 | TUFT1    | 7286   |
| ENSG00000144218 | AFF3     | 3899   |
| ENSG00000144460 | NYAP2    | 57624  |
| ENSG00000145217 | SLC26A1  | 10861  |
| ENSG00000145703 | IQGAP2   | 10788  |
| ENSG00000145730 | PAM      | 5066   |
| ENSG00000145741 | BTF3     | 689    |
| ENSG00000145819 | ARHGAP26 | 23092  |
| ENSG00000145907 | G3BP1    | 10146  |
| ENSG00000145916 | RMND5B   | 64777  |
| ENSG00000146007 | ZMAT2    | 153527 |
| ENSG00000147642 | SYBU     | 55638  |
| ENSG00000148677 | ANKRD1   | 27063  |
| ENSG00000149380 | P4HA3    | 283208 |
| ENSG00000149591 | TAGLN    | 6876   |
| ENSG00000150687 | PRSS23   | 11098  |
| ENSG00000152348 | ATG10    | 83734  |
| ENSG00000152409 | JMY      | 133746 |
| ENSG00000153015 | CWC27    | 10283  |
| ENSG00000153113 | CAST     | 831    |
| ENSG00000157625 | TAB3     | 257397 |
| ENSG00000157992 | KRTCAP3  | 200634 |
| ENSG00000160352 | ZNF714   | 148206 |
| ENSG00000160613 | PCSK7    | 9159   |
| ENSG00000161010 | C5orf45  | 51149  |
| ENSG00000162004 | CCDC78   | 124093 |
| ENSG00000164209 | SLC25A46 | 91137  |



|                 |          |        |
|-----------------|----------|--------|
| ENSG00000164244 | PRRC1    | 133619 |
| ENSG00000164292 | RHOBTB3  | 22836  |
| ENSG00000164307 | ERAP1    | 51752  |
| ENSG00000164308 | ERAP2    | 64167  |
| ENSG00000164346 | NSA2     | 10412  |
| ENSG00000164347 | GFM2     | 84340  |
| ENSG00000164402 | 8-Sep    | 23176  |
| ENSG00000164465 | DCBLD1   | 285761 |
| ENSG00000164587 | RPS14    | 6208   |
| ENSG00000164609 | SLU7     | 10569  |
| ENSG00000166411 | IDH3A    | 3419   |
| ENSG00000167306 | MYO5B    | 4645   |
| ENSG00000169567 | HINT1    | 3094   |
| ENSG00000170421 | KRT8     | 3856   |
| ENSG00000170445 | HARS     | 3035   |
| ENSG00000170606 | HSPA4    | 3308   |
| ENSG00000171310 | CHST11   | 50515  |
| ENSG00000171564 | FGB      | 2244   |
| ENSG00000172927 | MYEOV    | 26579  |
| ENSG00000173597 | SULT1B1  | 27284  |
| ENSG00000173674 | EIF1AX   | 1964   |
| ENSG00000174469 | CNTNAP2  | 26047  |
| ENSG00000175602 | CCDC85B  | 11007  |
| ENSG00000176907 | C8orf4   | 56892  |
| ENSG00000177189 | RPS6KA3  | 6197   |
| ENSG00000178913 | TAF7     | 6879   |
| ENSG00000178922 | HYI      | 81888  |
| ENSG00000179023 | KLHDC7A  | 127707 |
| ENSG00000179715 | PCED1B   | 91523  |
| ENSG00000179869 | ABCA13   | 154664 |
| ENSG00000179913 | B3GNT3   | 10331  |
| ENSG00000180448 | HMHA1    | 23526  |
| ENSG00000181163 | NPM1     | 4869   |
| ENSG00000182557 | SPNS3    | 201305 |
| ENSG00000188158 | NHS      | 4810   |
| ENSG00000189143 | CLDN4    | 1364   |
| ENSG00000196705 | ZNF431   | 170959 |
| ENSG00000197142 | ACSL5    | 51703  |
| ENSG00000198108 | CHSY3    | 337876 |
| ENSG00000198198 | SZT2     | 23334  |
| ENSG00000198380 | GFPT1    | 2673   |
| ENSG00000198478 | SH3BGRL2 | 83699  |
| ENSG00000198677 | TTC37    | 9652   |

|                 |            |           |
|-----------------|------------|-----------|
| ENSG00000198829 | SUCNR1     | 56670     |
| ENSG00000198865 | CCDC152    | 100129792 |
| ENSG00000198874 | TYW1       | 55253     |
| ENSG00000213347 | MXD3       | 83463     |
| ENSG00000214944 | ARHGEF28   | 64283     |
| ENSG00000224057 | EGFR-AS1   | 100507500 |
| ENSG00000225206 | MIR137HG   | 400765    |
| ENSG00000248445 | SEMA6A-AS1 | 101927233 |
| ENSG00000266751 | MIR3661    | 100500905 |

Table S3

|                  |                                                                    |
|------------------|--------------------------------------------------------------------|
| BAF180Q1298stopF | 5'-CTTCAGAAAACCAATTGTTCCCTTAGAAGGAGCCATCACCTTTGCTGG-3'             |
| BAF180Q1298stopR | 5'-CCAGCAAAGGTGATGGCTCCTTCTAAGGAACAATTGGTTTTCTGAAG-3'              |
| BAF180AgeI       | 5'-GGATATGACCGGTATGGGTTCCAAGAGAAGAAGAGCTACC-3'                     |
| BAF180ClaI       | 5'-GGCGGATCGATTTAAACATTTTCTAGGTTGTATGCTTG-3'                       |
| BAF180delta2BDF  | 5'-GGATATGACCGGTATGGTTTCAAATCCTTTTTATCAGCTTTATGAC-3'               |
| BAF180delta6BDF  | 5'-GGATATGACCGGTATGGGAGAGATTCTTCTTTCACCGGCAC-3'                    |
| BRG1sg2mutF      | 5'-ATGCATGAGAAGGGCATGTCGGACGATCCCAGGTACAACCAGATGAAAGGAATGGGGATG-3' |
| BRG1sg2mutR      | 5'-CATCCCCATTCTTTTCATCTGGTTGTACCTGGGATCGTCCGACATGCCCTTCTCATGCAT-3' |
| BRG1attB1F       | 5'-GGGGACAAGTTTGTACAAAAAAGCAGGCTTCATGTCCACTCCAGACCCACCCCTGGG-3'    |
| BRG1attB2R       | 5'-GGGGACCACTTTGTACAAGAAAGCTGGGTCAGTCTTCTTCGCTGCCACTTCCTG-3'       |

Table S4

|             |                                |
|-------------|--------------------------------|
| BAF180F23   | 5'-CTACCTCCCCTTCCAGCAGTGTC-3'  |
| BAF180F495  | 5'-TGGGCAAGACAATCAGGGCACAG-3'  |
| BAF180F1089 | 5'-TGCACGCTATGAAGAGGGAGAG-3'   |
| BAF180F1468 | 5'-AGAGACGATATCGAGGACGGAG-3'   |
| BAF180F2027 | 5'-GGGGTCGCCGCCTCAGTG-3'       |
| BAF180F2499 | 5'-CTACCGTCGGCTTGATTTATTTTC-3' |
| BAF180F3232 | 5'-ATGCCCATCAGCTCAGTCAGG-3'    |
| BAF180F3784 | 5'-AATGAGAGCGACAAGCAGATGAAG-3' |
| BAF180F4552 | 5'-CCTCCACCCCACCATCTTCC-3'     |

Table S5

|             |                                                                     |
|-------------|---------------------------------------------------------------------|
| shCtr       | 5'-ccggCAACAAGATGAAGAGCACCAActcgagTTGGTGCTCTTCATCTTGTTGttttt-3'     |
| shPBRM1-13  | 5'-ccggCCATAGTTGTAGCTACAAAttcaagagaTTTGTAGCTACAACATGGttttt-3'       |
| shPBRM1-32  | 5'-ccggGCACTCAGCTATAACCACAAaactcgagttTTGTGGTATAGCTGAGTGCTttttt-3'   |
| shPBRM1-61  | 5'-ccggGGACAGATTCAGAAATATAaactcgagttTATATTTCTGAATCTGTCCttttt-3'     |
| shPBRM1-161 | 5'-ccggCCGTGTGCCATGAACTCTATAAttcaagagaTATAGAGTTCATGGCACACGGttttt-3' |
| shPBRM1-91  | 5'-ccggCAGAAGACTTTGTGACCTAaactcgagttTAGGTCACAAAGTCTTCTGttttt-3'     |
| shPBRM1-111 | 5'-ccggGCGACAAGCAGATGAAGAAaactcgagttTTCTTCATCTGCTTGTCGCttttt-3'     |
| shPBRM1-122 | 5'-ccggGTTAGAAGGTGGAGATGATAaactcgagttATCATCTCCACCTTCTAACttttt-3'    |
| shPBRM1-141 | 5'-ccggCCATCTACAAGCGAGTTCTAAttcaagagaTTAGAACTCGCTTGTAGATGGttttt-3'  |
| shPBRM1-151 | 5'-ccggCGCTACCGTCGGCTTGATTTAttcaagagaTAAATCAAGCCGACGGTAGCGttttt-3'  |
| sgCtr       | 5'-CTTCCGCGGCCCGTTCAA-3'                                            |
| sgPBRM1-1   | 5'-CGAGGAGATCTATATCTT-3'                                            |
| sgPBRM1-2   | 5'-CATCCTTATAGTCTCGGA-3'                                            |
| sgPBRM1-3   | 5'-TGCCAGGAGAGACGATATCG-3'                                          |
| sgBRG1-1    | 5'-GCCGAGGAGTTCCGCCCA-3'                                            |
| sgBRG1-2    | 5'-TTCATCTGGTTGTAGCGC-3'                                            |
| sgBRM-1     | 5'-CATGCTGTGGACGGAACC-3'                                            |
| sgBRM-2     | 5'-GGACCCCATCGTCGGCAT-3'                                            |

Table S6

|                |                                   |
|----------------|-----------------------------------|
| pLKOteton8332F | 5'-GGACCCGACAGGCCCGAAGGAATAG-3'   |
| pLKOteton127R  | 5'-CGCTGCGAACGGACGTGAAGAATGTGC-3' |

Table S7

| Genes   | Forward                        | Reverse                       |
|---------|--------------------------------|-------------------------------|
| ALDOC   | 5'-TGCTGATGACCGTGTGAAAAA-3'    | 5'-CGGACGAAGGGAACACCAT-3'     |
| ANGPTL4 | 5'-GGCTCAGTGGACTTCAACCG-3'     | 5'-CCGTGATGCTATGCACCTTCT-3'   |
| CA-IX   | 5'-GGGTGTCATCTGGACTGTGTT-3'    | 5'-CTTCTGTGCTGCCTTCTCATC-3'   |
| CCND1   | 5'-CCGTCCATGCGGAAGATC-3'       | 5'-ATGGCCAGCGGGAAGAC-3'       |
| IGFBP3  | 5'-AGAGCACAGATACCCAGAACT-3'    | 5'-GGTGATTCAGTGTGTCTTCCATT-3' |
| NDRG1   | 5'-CTCCTGCAAGAGTTTGATGTCC-3'   | 5'-TCATGCCGATGTCATGGTAGG-3'   |
| VEGF    | 5'-CGAAACCATGAACTTTCTGC-3'     | 5'-CCTGAGTGGGCACACACTCC-3'    |
| GLUT-1  | 5'-ATCGTGGCCATCTTTGGCTTTGTG-3' | 5'-CTGGAAGCACATGCCACAATGAA-3' |
| PDK1    | 5'-GGATTGCCCATATCACGTCTTT-3'   | 5'-TCCCGTAACCCTCTAGGGAATA-4'  |
